# Supplementary material for: Unraveling the interplay between hydrogen bonding and rotational energy barrier to fine-tune the properties of triazine molecular glasses
Source: Royal Society of Chemistry journal article supplement (doi:10.1039/c5cp06630a), 2015-12-08

## Unraveling the interplay between hydrogen bonding and rotational energy barrier to fine-tune the properties of triazine molecular glasses

### Supporting Information

Audrey Laventure,<sup>†</sup> Guillaume De Grandpré,<sup>§</sup> Armand Soldera,<sup>§</sup> Olivier Lebel<sup>\*,‡</sup> and  
Christian Pellerin<sup>\*,†</sup>

<sup>†</sup> *Département de chimie, Université de Montréal, Montréal, QC, H3C 3J7, Canada*

<sup>§</sup> *Département de chimie, Université de Sherbrooke, Sherbrooke, QC, J1K 2R1, Canada*

<sup>‡</sup> *Department of Chemistry and Chemical Engineering, Royal Military College of Canada,  
Kingston, ON, K7K 7B4, Canada*

\*Corresponding authors: [c.pellerin@umontreal.ca](mailto:c.pellerin@umontreal.ca); [olivier.lebel@rmc.ca](mailto:olivier.lebel@rmc.ca)

## Synthesis of compounds 13-15

To confirm the observed trends in the thermal behavior of compounds **1-12**, analogues **13-15** where both methylamino ancillary groups are replaced by phenylamino groups were synthesized in 62-85 % yield from the corresponding bis(phenylamino)chlorotriazines and sodium methoxide in methanol (Scheme S1) following a previously published procedure.<sup>1</sup>

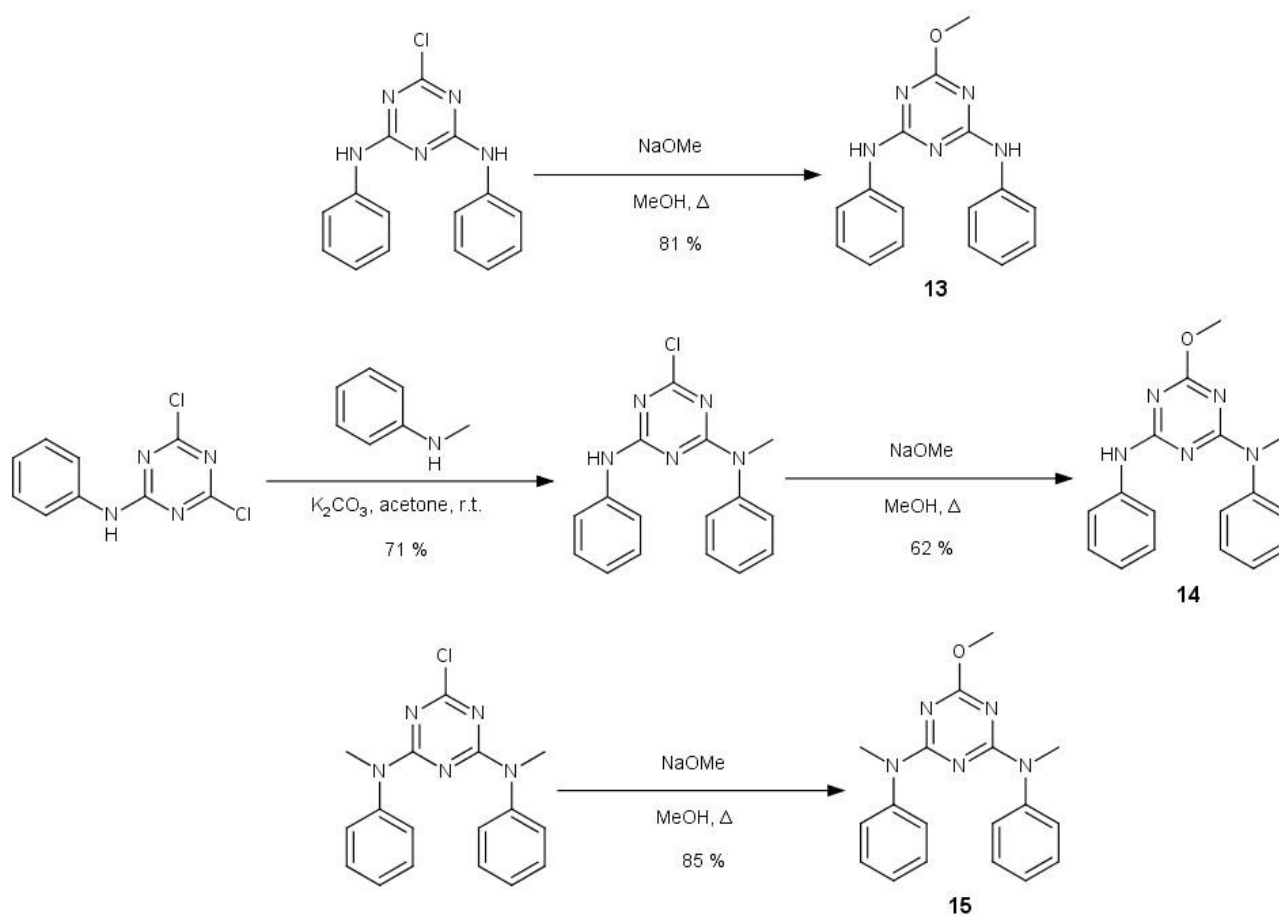

Scheme S1.

### 2-Methoxy-4-phenylamino-6-(N-methylphenylamino)-1,3,5-triazine (**14**)

2-Phenylamino-4,6-dichloro-1,3,5-triazine (1.00 g, 4.15 mmol) was dissolved in acetone (20 mL) in a round-bottomed flask equipped with a magnetic stirrer. K<sub>2</sub>CO<sub>3</sub> (0.574 g, 4.15 mmol) was added, then the flask was placed in an ice bath. A solution of N-methylaniline (0.450 mL, 0.445 g, 4.15 mmol) in acetone (10 mL) was then slowly added at 0-5 °C under vigorous

stirring, after which the ice bath was removed and the mixture was stirred for 18h at ambient temperature, after which H<sub>2</sub>O was added. The product was extracted with ethyl ether, the organic layer was washed successively with 1M aqueous HCl, aqueous NaHCO<sub>3</sub> and brine, dried over Na<sub>2</sub>SO<sub>4</sub>, filtered, and the solvent was evaporated under reduced pressure. Recrystallization from hot hexanes afforded 0.914 g 2-chloro-4-phenylamino-6-(N-methylphenylamino)-1,3,5-triazine (2.93 mmol, 71 %). T<sub>m</sub> 126 °C; FT-IR (ATR/CH<sub>2</sub>Cl<sub>2</sub>) 3393, 3275, 3204, 3166, 3121, 3094, 3061, 3037, 2952, 2929, 2870, 1602, 1574, 1524, 1497, 1446, 1404, 1388, 1353, 1317, 1250, 1228, 1162, 1114, 1097, 1027, 976, 931, 900, 837, 800, 757, 735, 695, 627 cm<sup>-1</sup>; <sup>1</sup>H NMR (400 MHz, DMSO-*d*<sub>6</sub>, 363 K) δ 9.76 (s, 1H), 7.53 (d, <sup>3</sup>*J* = 7.8 Hz, 2H), 7.47 (t, <sup>3</sup>*J* = 8.1 Hz, 2H), 7.37 (m, 3H), 7.18 (t, <sup>3</sup>*J* = 7.6 Hz, 2H), 6.99 (t, <sup>3</sup>*J* = 7.1 Hz, 2H), 3.48 (s, 3H) ppm; <sup>13</sup>C NMR (75 MHz, DMSO-*d*<sub>6</sub>) δ 168.7, 165.5, 163.2, 143.9, 139.1, 129.5, 128.8, 127.3, 127.1, 123.2, 120.1, 38.6 ppm; HRMS (ESI, MNa<sup>+</sup>) calcd. for C<sub>16</sub>H<sub>14</sub>ClNaN<sub>5</sub> *m/e*: 334.0835, found: 334.0839.

2-chloro-4-phenylamino-6-(N-methylphenylamino)-1,3,5-triazine (0.814 g, 2.61 mmol) was dissolved in methanol (20 mL) in a round-bottomed flask equipped with a magnetic stirrer and a water-jacketed condenser. A methanolic NaOMe solution (25 wt%, 0.846 mL, 3.92 mmol) was added, and the mixture was refluxed for 18 h. The volatiles were concentrated under vacuum, then CH<sub>2</sub>Cl<sub>2</sub> and H<sub>2</sub>O were added, and both layers were separated. The organic layer was recovered, dried over Na<sub>2</sub>SO<sub>4</sub>, filtered, and the solvent was evaporated under reduced pressure. Recrystallization from hot hexanes afforded 0.494 g of pure compound **14** (1.61 mmol, 62 %). T<sub>g</sub> 30 °C, T<sub>c</sub> 102 °C, T<sub>m</sub> 141 °C; FT-IR (ATR/CH<sub>2</sub>Cl<sub>2</sub>) 3391, 3275, 3191, 3158, 3100, 3061, 3033, 3011, 2994, 2951, 2906, 2868, 1610, 1602, 1577, 1561, 1539, 1494, 1462, 1443, 1405, 1389, 1358, 1299, 1265, 1245, 12010, 1180, 1156, 1120, 1097, 1052, 1028, 989, 961, 901, 853, 810, 756, 736, 694, 670 cm<sup>-1</sup>; <sup>1</sup>H NMR (400 MHz, DMSO-*d*<sub>6</sub>, 363 K) δ 9.17 (br s, 1H), 7.61 (d, <sup>3</sup>*J* = 8.1 Hz, 2H), 7.43 (t, <sup>3</sup>*J* = 8.1 Hz, 2H), 7.37 (d, <sup>3</sup>*J* = 7.1 Hz, 2H), 7.29 (t, <sup>3</sup>*J* = 7.1 Hz, 1H), 7.17 (t, <sup>3</sup>*J* = 8.1 Hz, 2H), 6.94 (t, <sup>3</sup>*J* = 7.3 Hz, 1H), 3.86 (s, 3H), 2.50 (s, 3H) ppm; <sup>13</sup>C NMR (75 MHz, DMSO-*d*<sub>6</sub>) δ 170.9, 166.8, 165.1, 144.6, 140.1, 129.2, 128.6, 127.3, 126.4, 122.4, 120.0, 54.1, 38.1 ppm; HRMS (ESI, MNa<sup>+</sup>) calcd. for C<sub>17</sub>H<sub>17</sub>NaN<sub>5</sub>O *m/e*: 330.1331, found: 330.1336.

### **2-Methoxy-4,6-bis(N-methylphenylamino)-1,3,5-triazine (15)**

2-chloro-4,6-bis(N-methylphenylamino)-1,3,5-triazine (1.44 g, 4.43 mmol) was dissolved in methanol (30 mL) in a round-bottomed flask equipped with a magnetic stirrer and a water-jacketed condenser. A methanolic NaOMe solution (25 wt%, 1.44 mL, 6.65 mmol) was added, and the mixture was refluxed for 18 h. The volatiles were concentrated under vacuum, then CH<sub>2</sub>Cl<sub>2</sub> and H<sub>2</sub>O were added, and both layers were separated. The organic layer was recovered, dried over Na<sub>2</sub>SO<sub>4</sub>, filtered, and the solvent was evaporated under reduced pressure and dried thoroughly to yield 1.22 g of compound 15 (3.79 mmol, 85 %). T<sub>g</sub> -21 °C; FT-IR (ATR/CH<sub>2</sub>Cl<sub>2</sub>) 3090, 3061, 3035, 3010, 2980, 2948, 2895, 2866, 2808, 2790, 1603, 1561, 1528, 1494, 1477, 1460, 1444, 1385, 1358, 1299, 1270, 1212, 1162, 1105, 1028, 996, 977, 955, 906, 835, 810, 764, 735, 696 cm<sup>-1</sup>; <sup>1</sup>H NMR (300 MHz, CDCl<sub>3</sub>, 298 K) δ 7.30 (m, 8H), 7.17 (t, <sup>3</sup>J = 7.0 Hz, 2H), 3.78 (s, 3H), 3.45 (s, 6H) ppm; <sup>13</sup>C NMR (75 MHz, CDCl<sub>3</sub>) δ 170.7, 166.3, 144.3, 128.5, 126.4, 125.5, 53.8, 37.7 ppm; HRMS (ESI, MNa<sup>+</sup>) calcd. for C<sub>18</sub>H<sub>19</sub>NaN<sub>5</sub>O *m/e*: 344.1487, found: 344.1493.

**Table S1.** Comparison of the glass transition temperature ( $T_g$ ), crystallisation temperature ( $T_c$ ) and melting temperature ( $T_m$ ) of compounds **1-12**.

| Linkers  | Headgroup |            |            |            |           |            |            |            |
|----------|-----------|------------|------------|------------|-----------|------------|------------|------------|
|          | NHMe      |            |            |            | OMe       |            |            |            |
|          |           | $T_g$ (°C) | $T_c$ (°C) | $T_m$ (°C) |           | $T_g$ (°C) | $T_c$ (°C) | $T_m$ (°C) |
| NH, NH   | <b>1</b>  | 94         | -          | -          | <b>2</b>  | 58         | -          | 168        |
| O,O      | <b>5</b>  | 41         | 58, 100    | 180        | <b>3</b>  | 11         | 98         | 129        |
| NH, O    | <b>4</b>  | 42         | 122        | 178        | <b>6</b>  | 37         | -          | -          |
| NH, NMe  | <b>7</b>  | 63         | -          | -          | <b>9</b>  | 44         | 126        | 148        |
| NMe, NMe | <b>8</b>  | 21         | -          | -          | <b>10</b> | -25        | -          | -          |
| NMe, O   | <b>11</b> | 33         | 126        | 152        | <b>12</b> | 8          | -          | 129        |

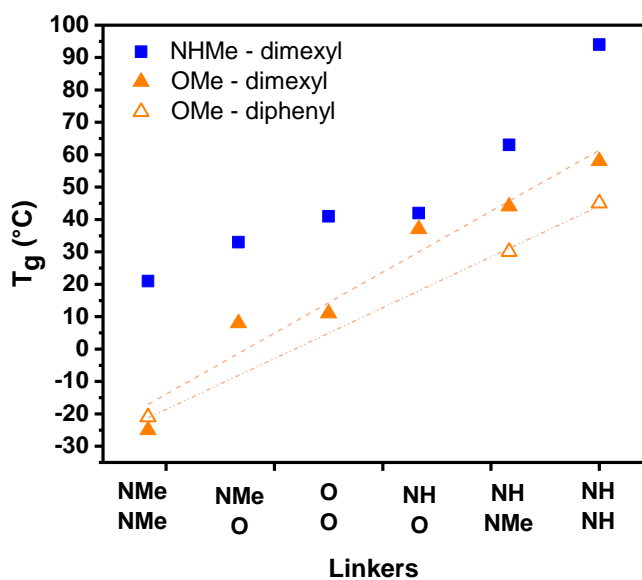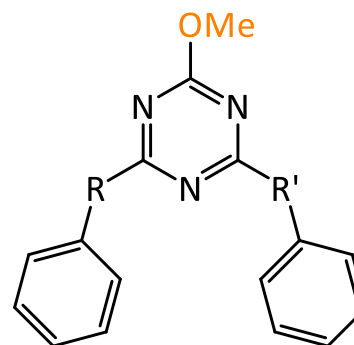

**Linker:** R, R' = NH or NMe

**Figure S1.** Evolution of  $T_g$  according to their headgroup and linkers. Compounds bearing an OMe headgroup and diphenyl moieties as shown on the right (dashed-dotted line, shown at the right of the figure and represented by open symbols) follow the trend of the dimexyl (dashed line) for the Ome headgroup series of compounds.

## Chemometrics processing of the spectra

From the experimental spectral input data, the algorithm first defines the pure variables (the wavenumbers that present the highest ratio of standard deviation to the mean)<sup>2</sup> to enable the calculation of the pure component spectra, *i.e.* the spectra that would be equivalent to a totally “free” NH species and a totally “bonded” NH species in our case (see Figure S2). These two spectra can then be used in a linear combination to reproduce the experimental spectral input data. Principal component analysis (PCA) was conducted prior to the SMMA and revealed that, for all compounds, two components account for 97 to 99% of the variance of the experimental spectral input data, meaning that our system can be reasonably well described using solely the “free” and “bonded” components.<sup>2,3,4</sup>

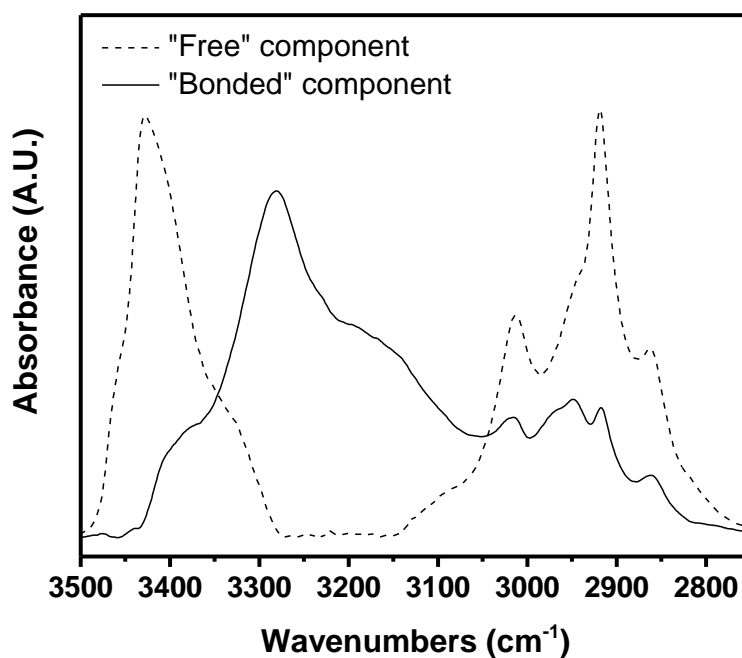

**Figure S2.** Pure components spectra corresponding to the “free” NH species and the “bonded” NH species extracted from the variable-temperature IR spectra of the NHMe/NH,NH compound **1**.

Figure S3 compares the original (experimental) and the reconstructed data. In all cases, the calculated relative root sum of square difference (rrssq, which calculates the difference between the two data sets) lies between 0.003 and 0.015, indicating an excellent agreement

between the two sets of spectra and confirming the uselessness of considering a third component to describe the system. Indeed, the intensity of the residuals is two orders of magnitude lower than the intensity of the original spectra. Sometimes, residuals show what could be considered as structured data, where a derivative-shaped band showed in between the “free” and the “bonded” bands (around  $3325\text{ cm}^{-1}$  for the NHMe/NH,NH compound **1**, see the right panel of Figure S3). A similar third component was observed in other H-bonded systems and defined as the intermediate case between the two species by Šašić *et al.*, among others.<sup>2</sup> In the present case, and in the cases reported in the literature, this component does not contribute significantly to the data, accounting for less than 1% of the original spectra. A two-component representation was thus chosen as a suitable model for the systems (without ruling out the existence of a minor third species in the real system). The fractions of each species displayed in Figure 3 of the main text correspond to the multiplying factor needed to reconstruct the spectral data from the two corresponding pure component spectra. It must be emphasized that we do not claim that these fractions, although absolute (versus relative), stand as the “real” numbers. Indeed, Dupuy *et al.* have demonstrated that quantification with this SMMA method leads to a relative error of 10%.<sup>5</sup> However, we believe that the comparison of this quantification is still meaningful because the data processing was done identically for all compounds.

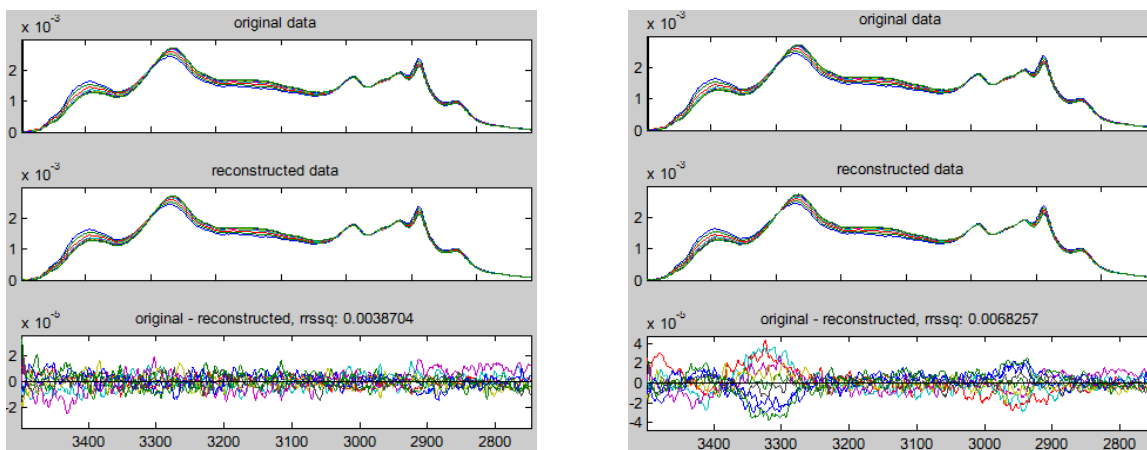

**Figure S3.** Reconstructed original spectra of NHMe/NH,NH compound **1** for two independent samples using two pure component spectra. In the left panel, no evidence of a residual component is found while a small contribution, larger at extreme temperatures, is found around  $3325\text{ cm}^{-1}$  in the right panel.

**Table S2.** Average fraction of bonded NH ( $\pm$  standard deviation for three measurements) at different temperatures for the compounds studied by variable-temperature IR spectroscopy.

| Linkers  | Headgroup |                    |                    |                    |           |                    |                    |                    |
|----------|-----------|--------------------|--------------------|--------------------|-----------|--------------------|--------------------|--------------------|
|          | NHMe      |                    |                    |                    | OMe       |                    |                    |                    |
|          |           | $T_g - 20$         | $T_g$              | $T_g + 40$         |           | $T_g - 20$         | $T_g$              | $T_g + 40$         |
| NH, NH   | <b>1</b>  | 0.77<br>$\pm 0.02$ | 0.74<br>$\pm 0.01$ | 0.66<br>$\pm 0.01$ | <b>2</b>  | 0.85<br>$\pm 0.01$ | 0.83<br>$\pm 0.01$ | 0.76<br>$\pm 0.01$ |
| O, O     | <b>5</b>  | -                  | -                  | -                  | <b>3</b>  | -                  | -                  | -                  |
| NH, O    | <b>4</b>  | -                  | 0.86<br>$\pm 0.01$ | 0.79<br>$\pm 0.02$ | <b>6</b>  | -                  | 0.85<br>$\pm 0.01$ | 0.75<br>$\pm 0.01$ |
| NH, NMe  | <b>7</b>  | 0.77<br>$\pm 0.02$ | 0.73<br>$\pm 0.02$ | 0.60<br>$\pm 0.03$ | <b>9</b>  | -                  | 0.8<br>$\pm 0.1$   | 0.72<br>$\pm 0.1$  |
| NMe, NMe | <b>8</b>  | 0.73<br>$\pm 0.02$ | 0.71<br>$\pm 0.01$ | 0.55<br>$\pm 0.02$ | <b>10</b> | -                  | -                  | -                  |
| NMe, O   | <b>11</b> | -                  | 0.81<br>$\pm 0.02$ | 0.67<br>$\pm 0.01$ | <b>12</b> | -                  | -                  | -                  |

#### Calculation of the enthalpy of H-bond formation

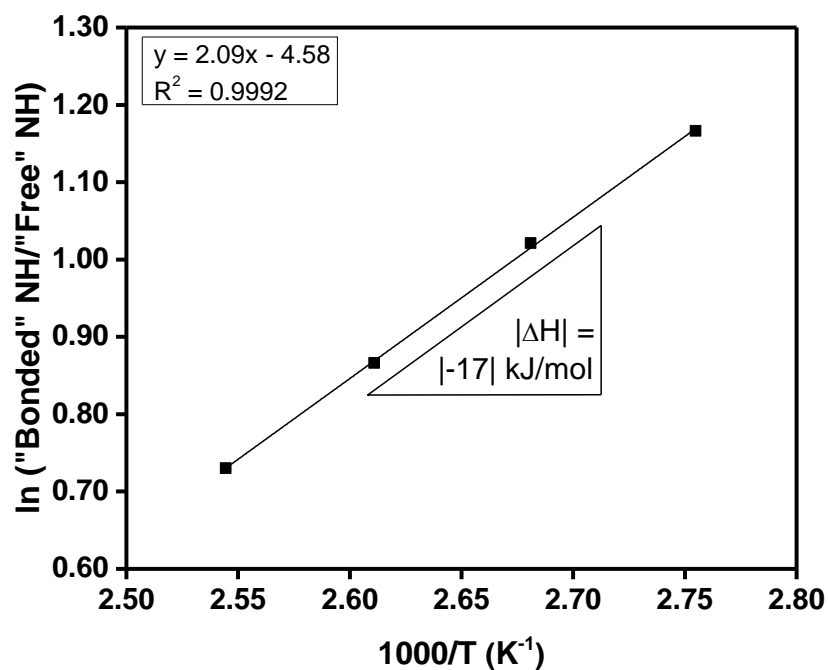

**Figure S4.** Construction of the van't Hoff plot from the “bonded” and “free” NH fractions of the NHMe/NH,NH (1). The value of the slope gives access to the  $\Delta H$  of H-bonds formation.



**Table S3.** Enthalpy of H-bond formation ( $\pm$  standard deviation for three measurements) for the compounds studied by variable-temperature IR spectroscopy.

| Linkers  | Headgroup |                |           |            |
|----------|-----------|----------------|-----------|------------|
|          | NHMe      |                | OMe       |            |
|          | kJ/mol    |                | kJ/mol    |            |
| NH, NH   | <b>1</b>  | $17 \pm 2$     | <b>2</b>  | $12 \pm 1$ |
| O,O      | <b>5</b>  | -              | <b>3</b>  | -          |
| NH, O    | <b>4</b>  | $16 \pm 1$     | <b>6</b>  | $16 \pm 1$ |
| NH, NMe  | <b>7</b>  | $17.8 \pm 0.4$ | <b>9</b>  | $13 \pm 2$ |
| NMe, NMe | <b>8</b>  | $23 \pm 2$     | <b>10</b> | -          |
| NMe, O   | <b>11</b> | $19 \pm 2$     | <b>12</b> | -          |

## References

1. Lebel, O., Maris, T., Perron, M.-È., Demers, E., Wuest, J. D. *J. Am. Chem. Soc.* **2006**, *128*, 10372.
2. Šašić, S., Segtnan, V. H., Ozaki, Y. *J. Phys. Chem. A* **2002**, *106*, 760.
3. Libnau, F. O., Toft, J., Christy, A. A., Kvalheim, O. M. *J. Am. Chem. Soc.* **1994**, *116*, 8311.
4. Segtnan, V. H., Šašić, Š., Isaksson, T., Ozaki, Y. *Anal. Chem.* **2001**, *73*, 3153.
5. Dupuy, N., Batonneau, Y. *Anal. Chim. Acta* **2003**, *495*, 205.

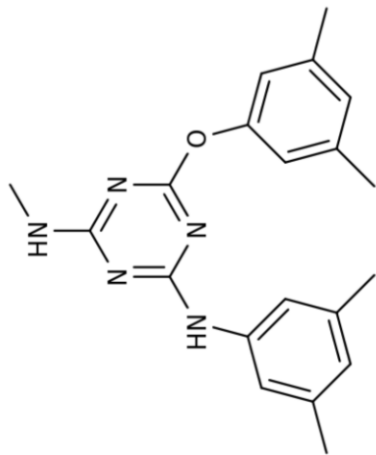

**4**  
363 K

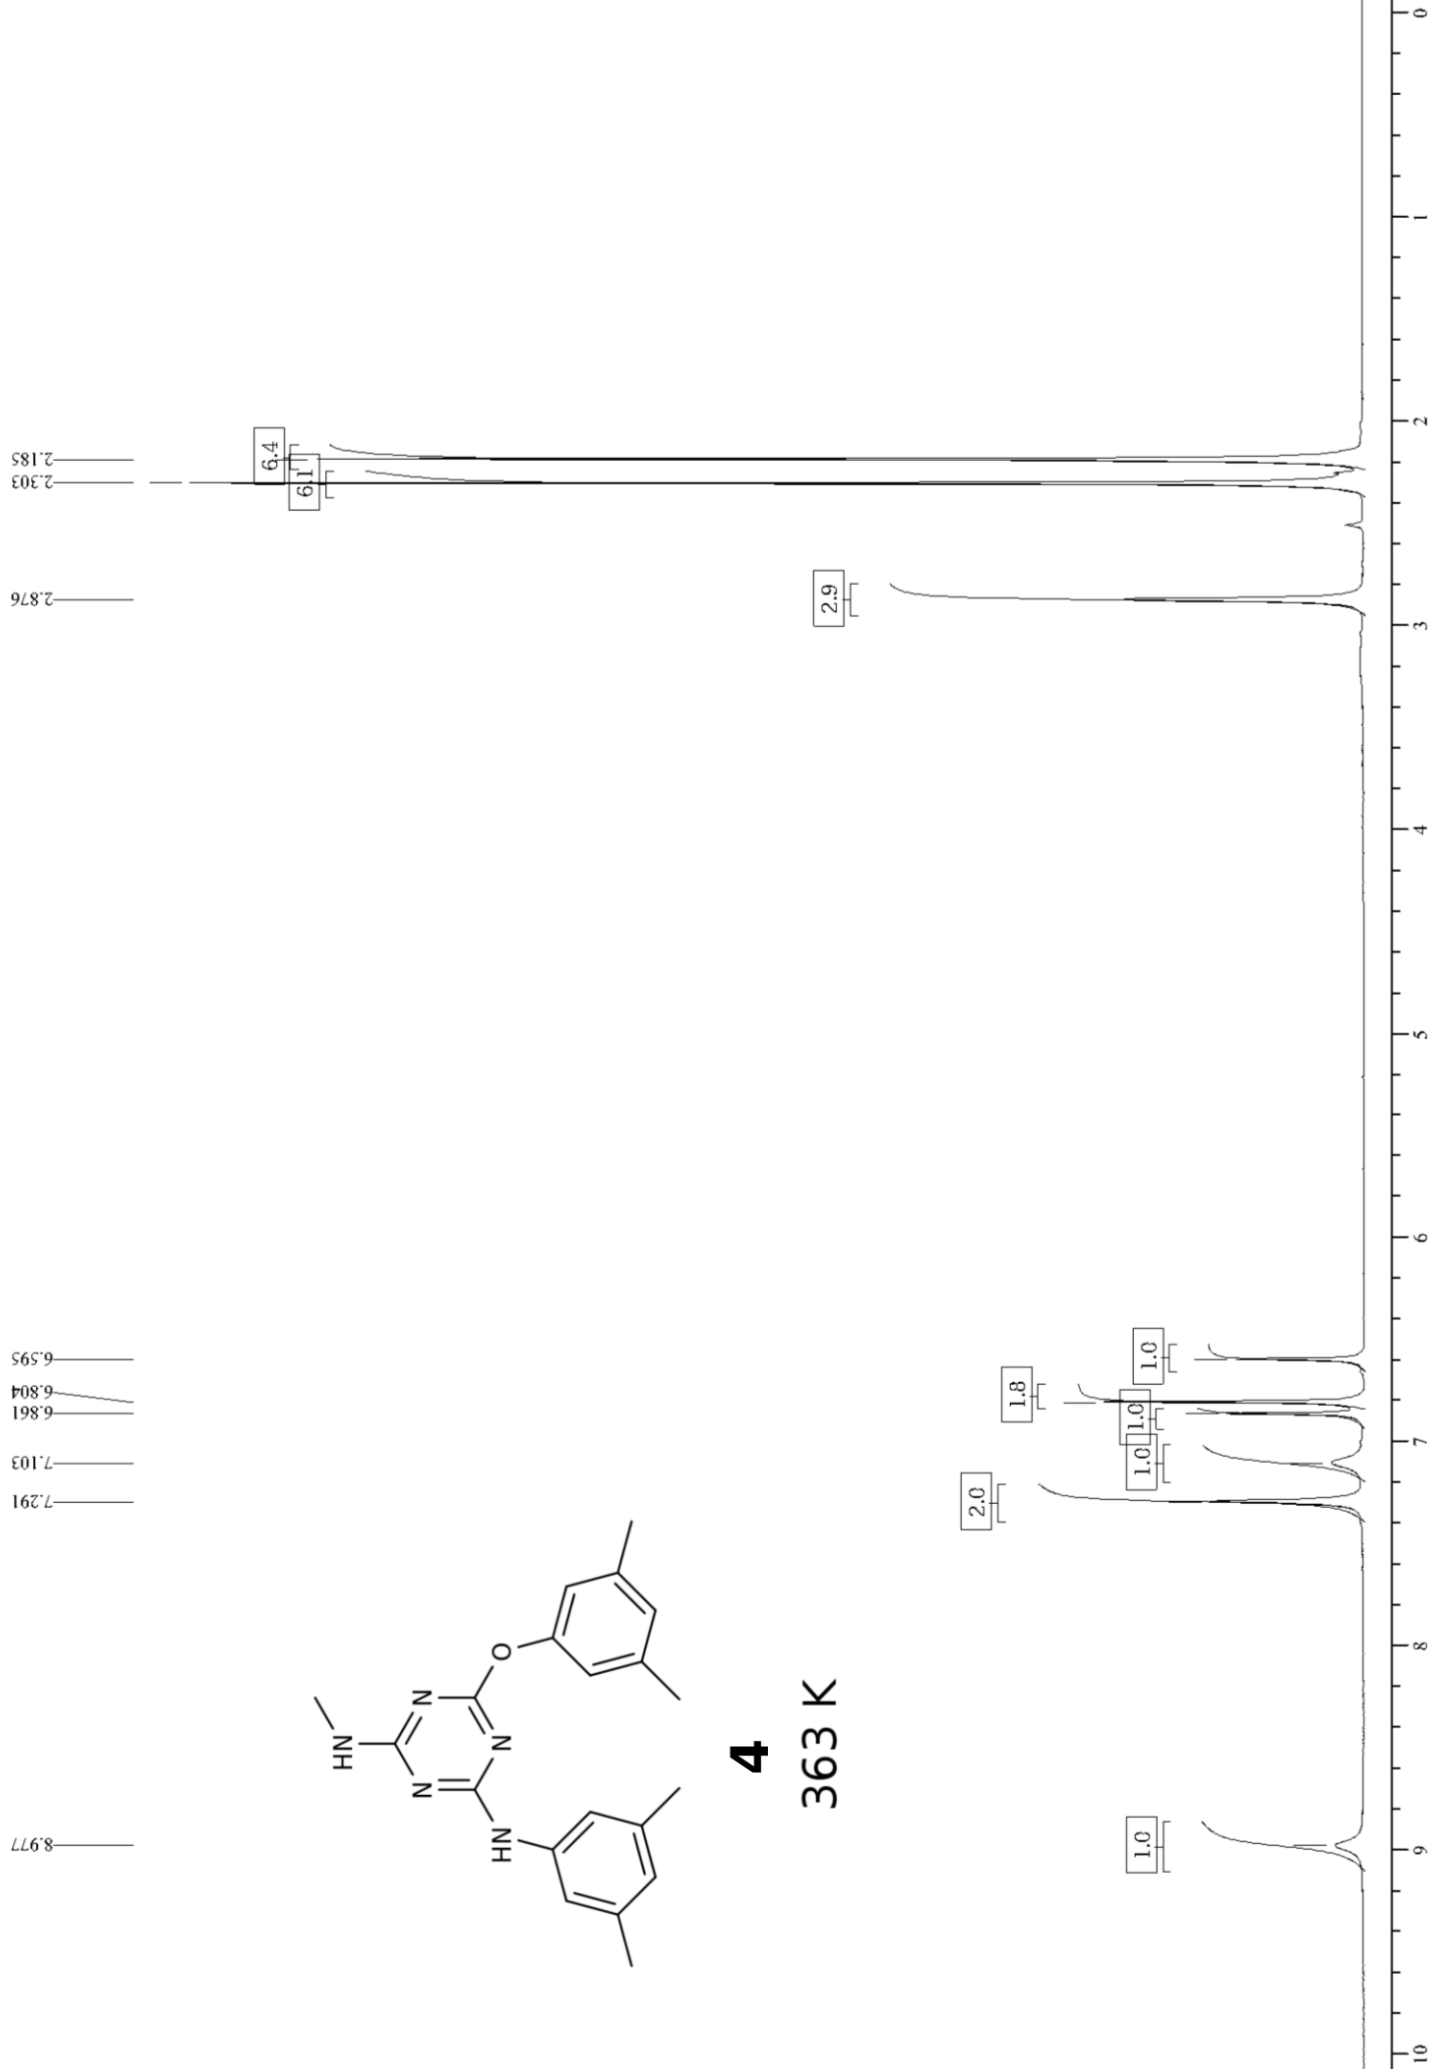

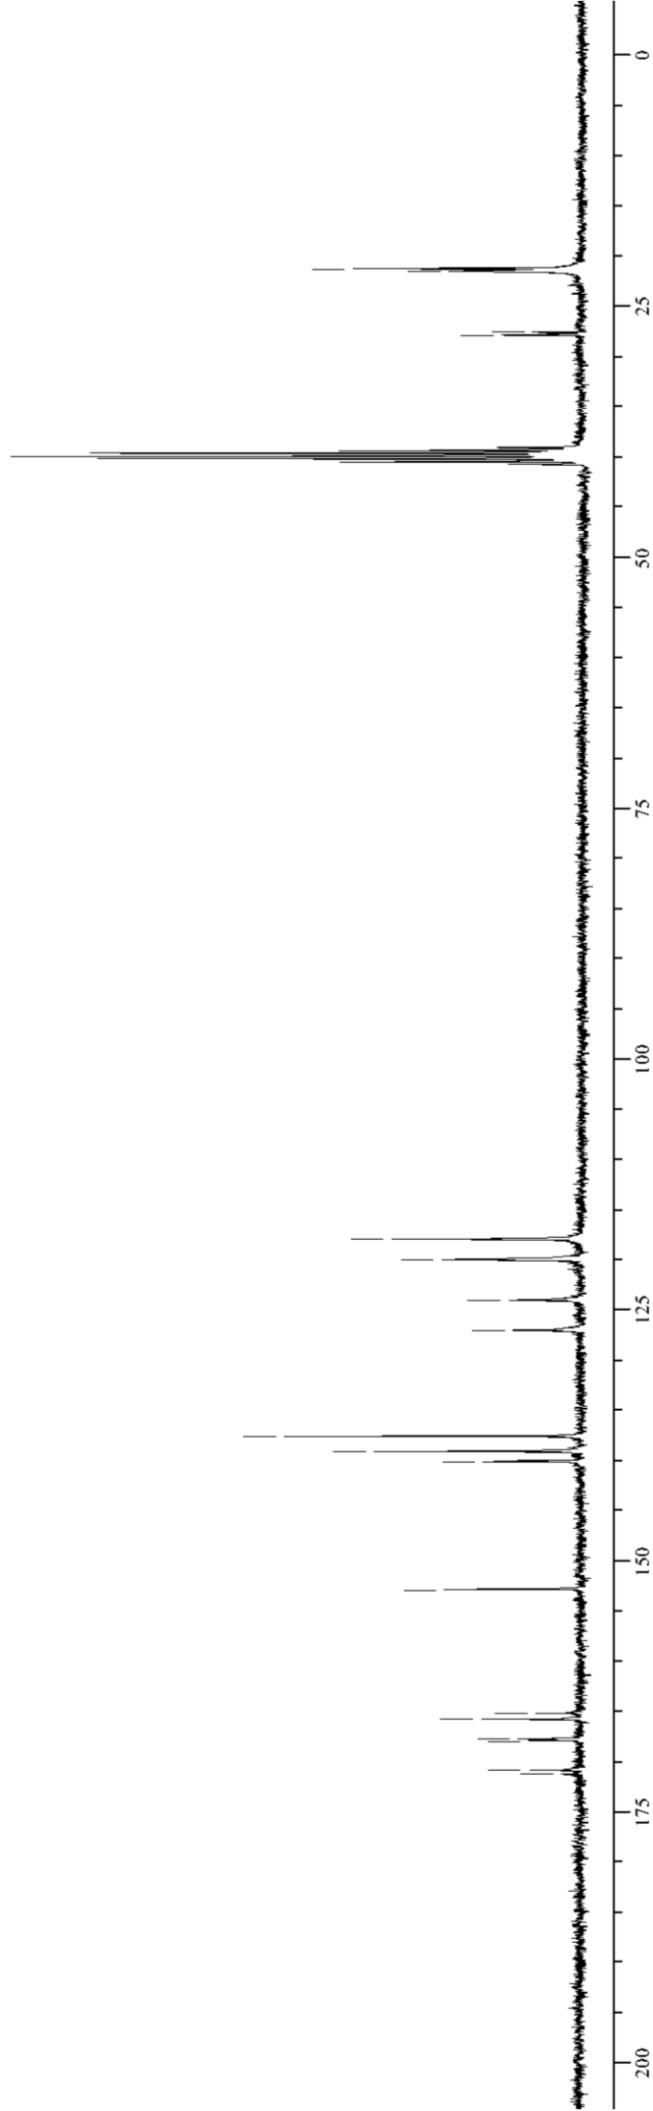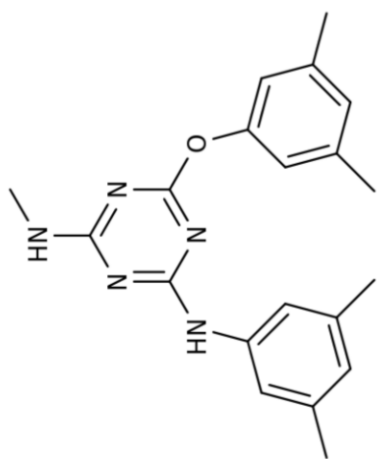

4

21.218  
21.508  
27.576  
27.822

117.894  
119.962  
124.008  
127.005

137.561  
139.095  
140.065

152.798

165.132  
165.734  
167.732  
167.863  
170.791  
171.232

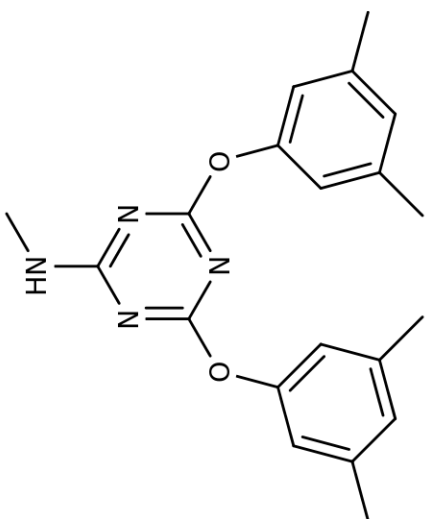

**5**

2.282  
2.291

2.895  
2.910

6.265

6.826  
6.791  
6.736

12.6

3.0

7.87  
7.83  
7.79

1.0

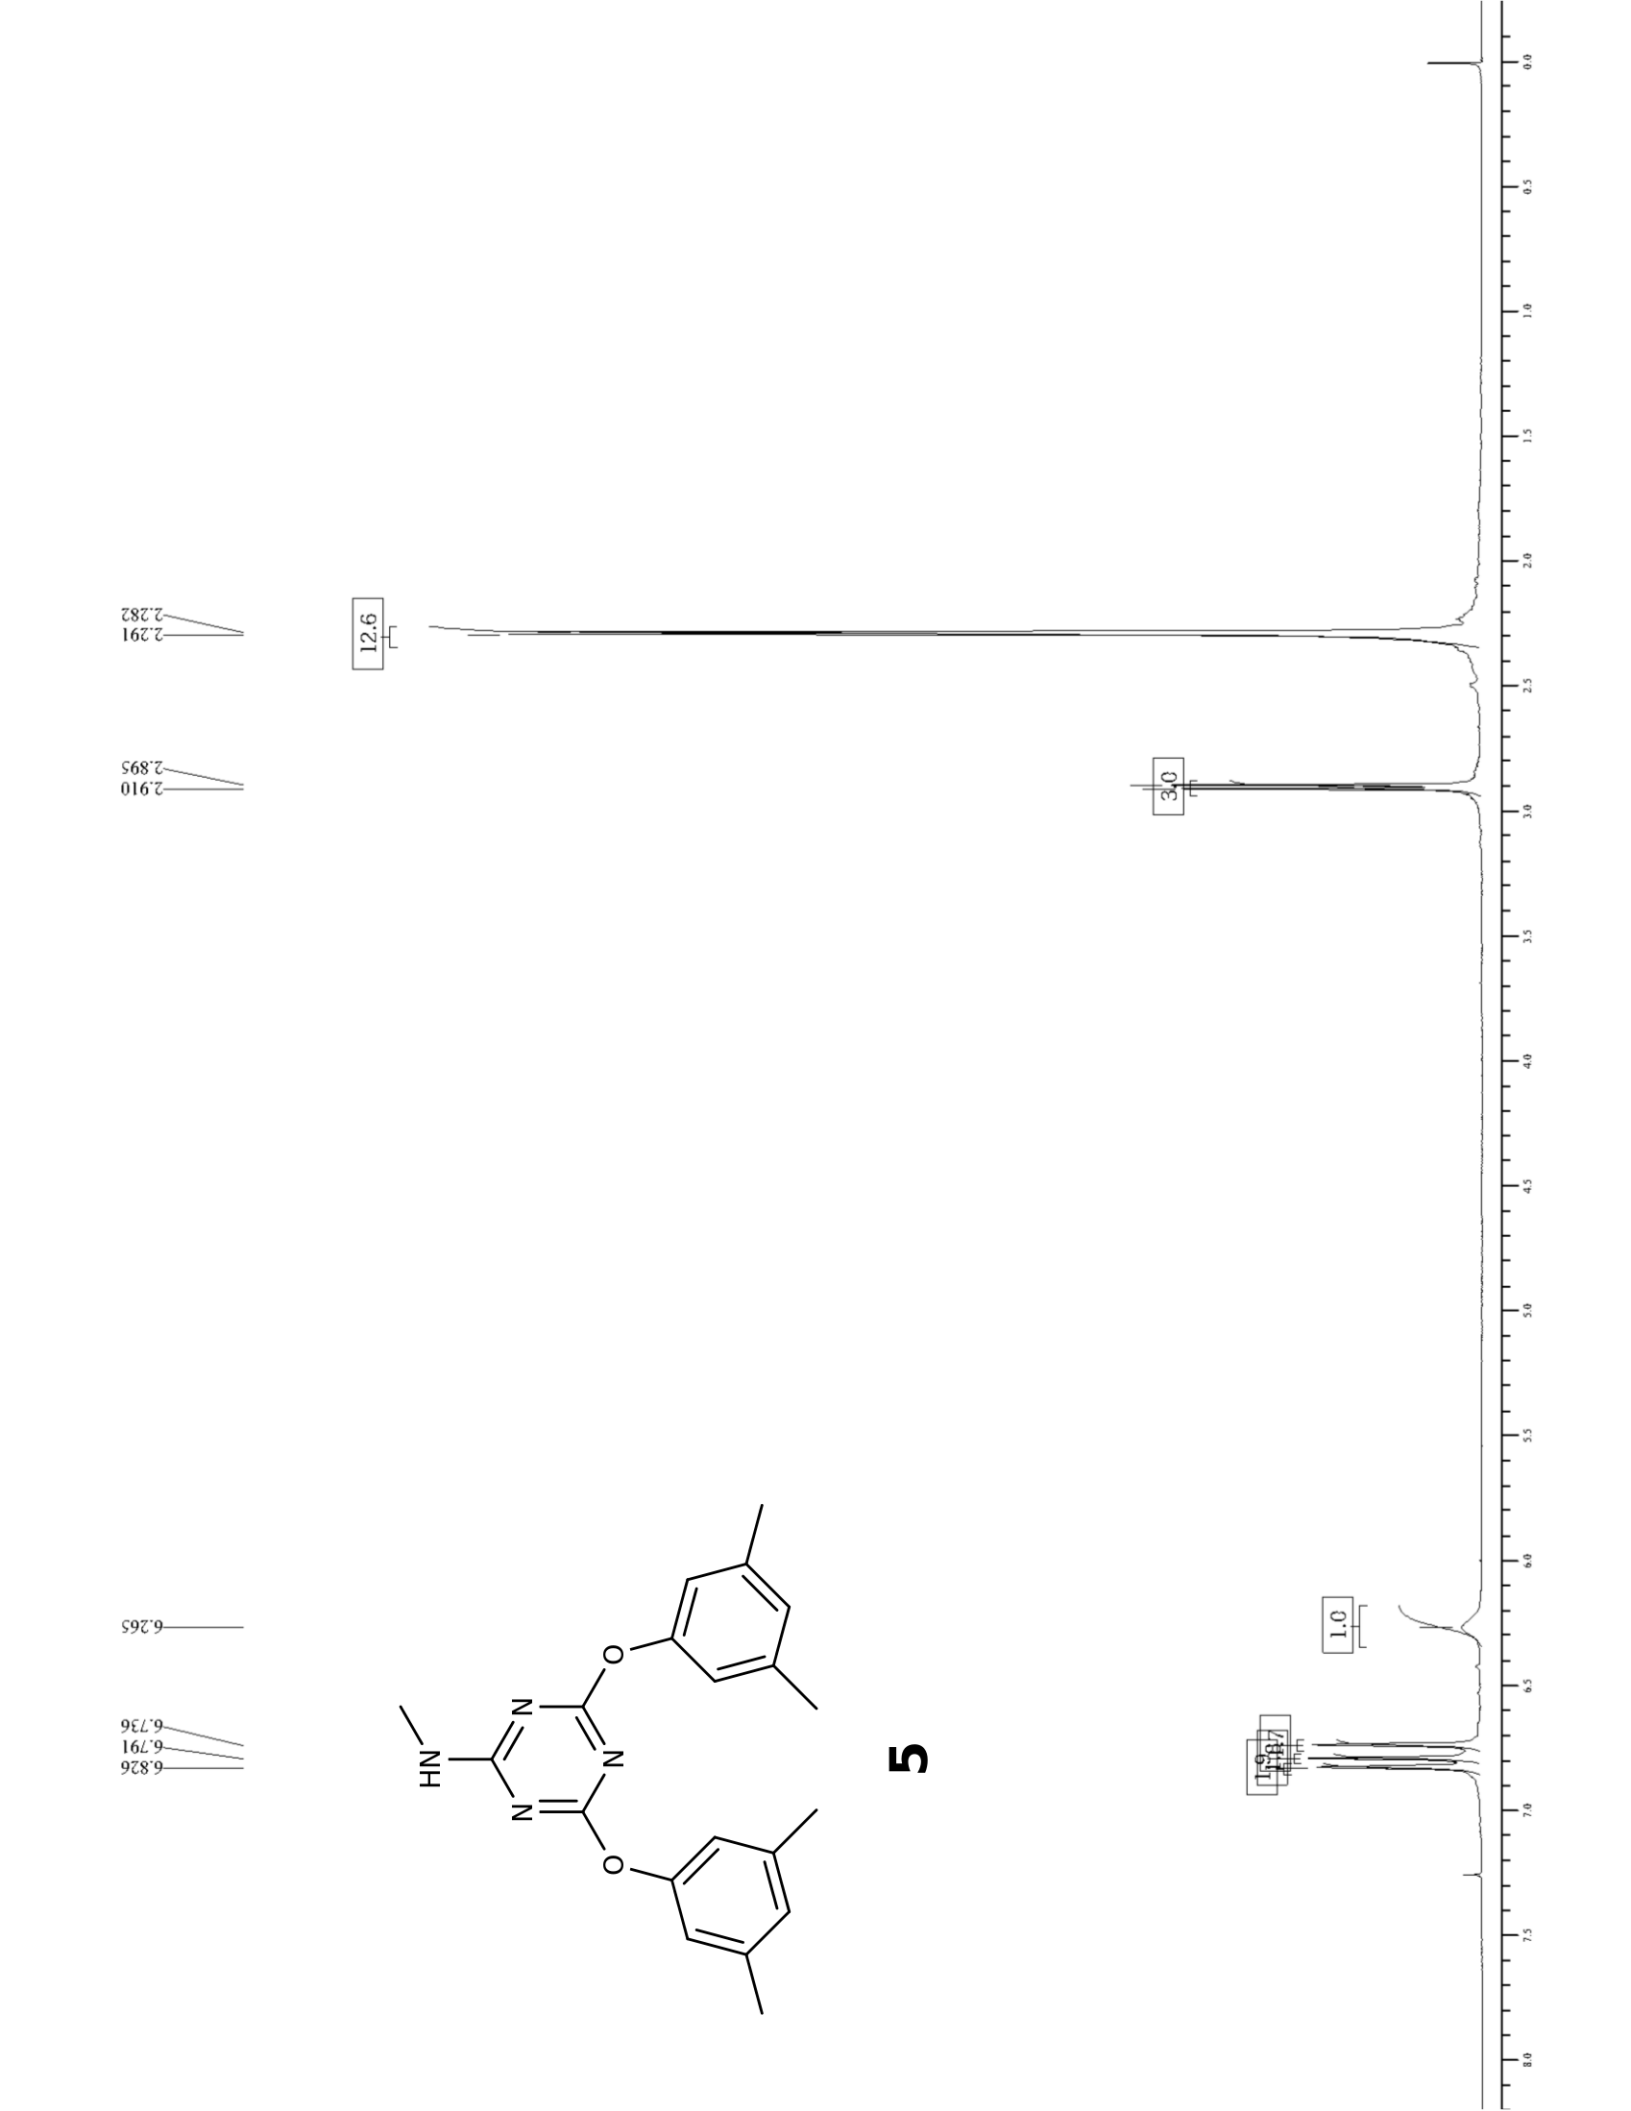

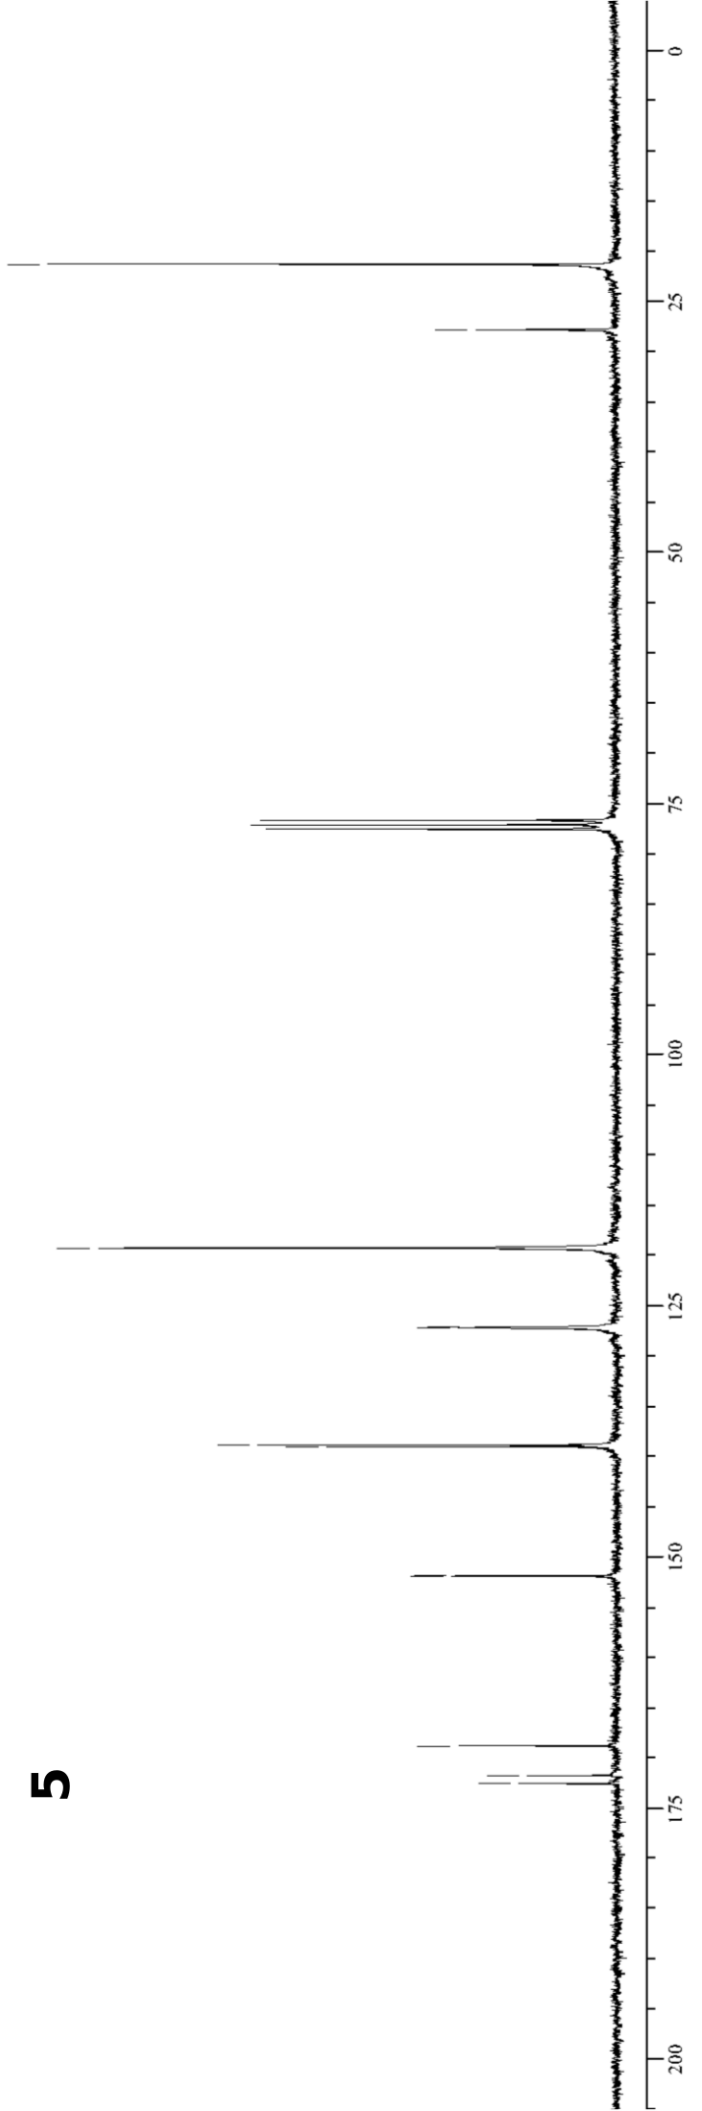

5

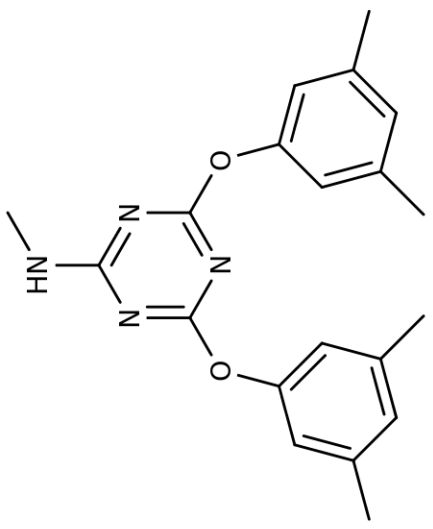

21.272

27.793

119.213

127.203

138.822

138.993

151.849

151.907

168.799

171.745

172.524

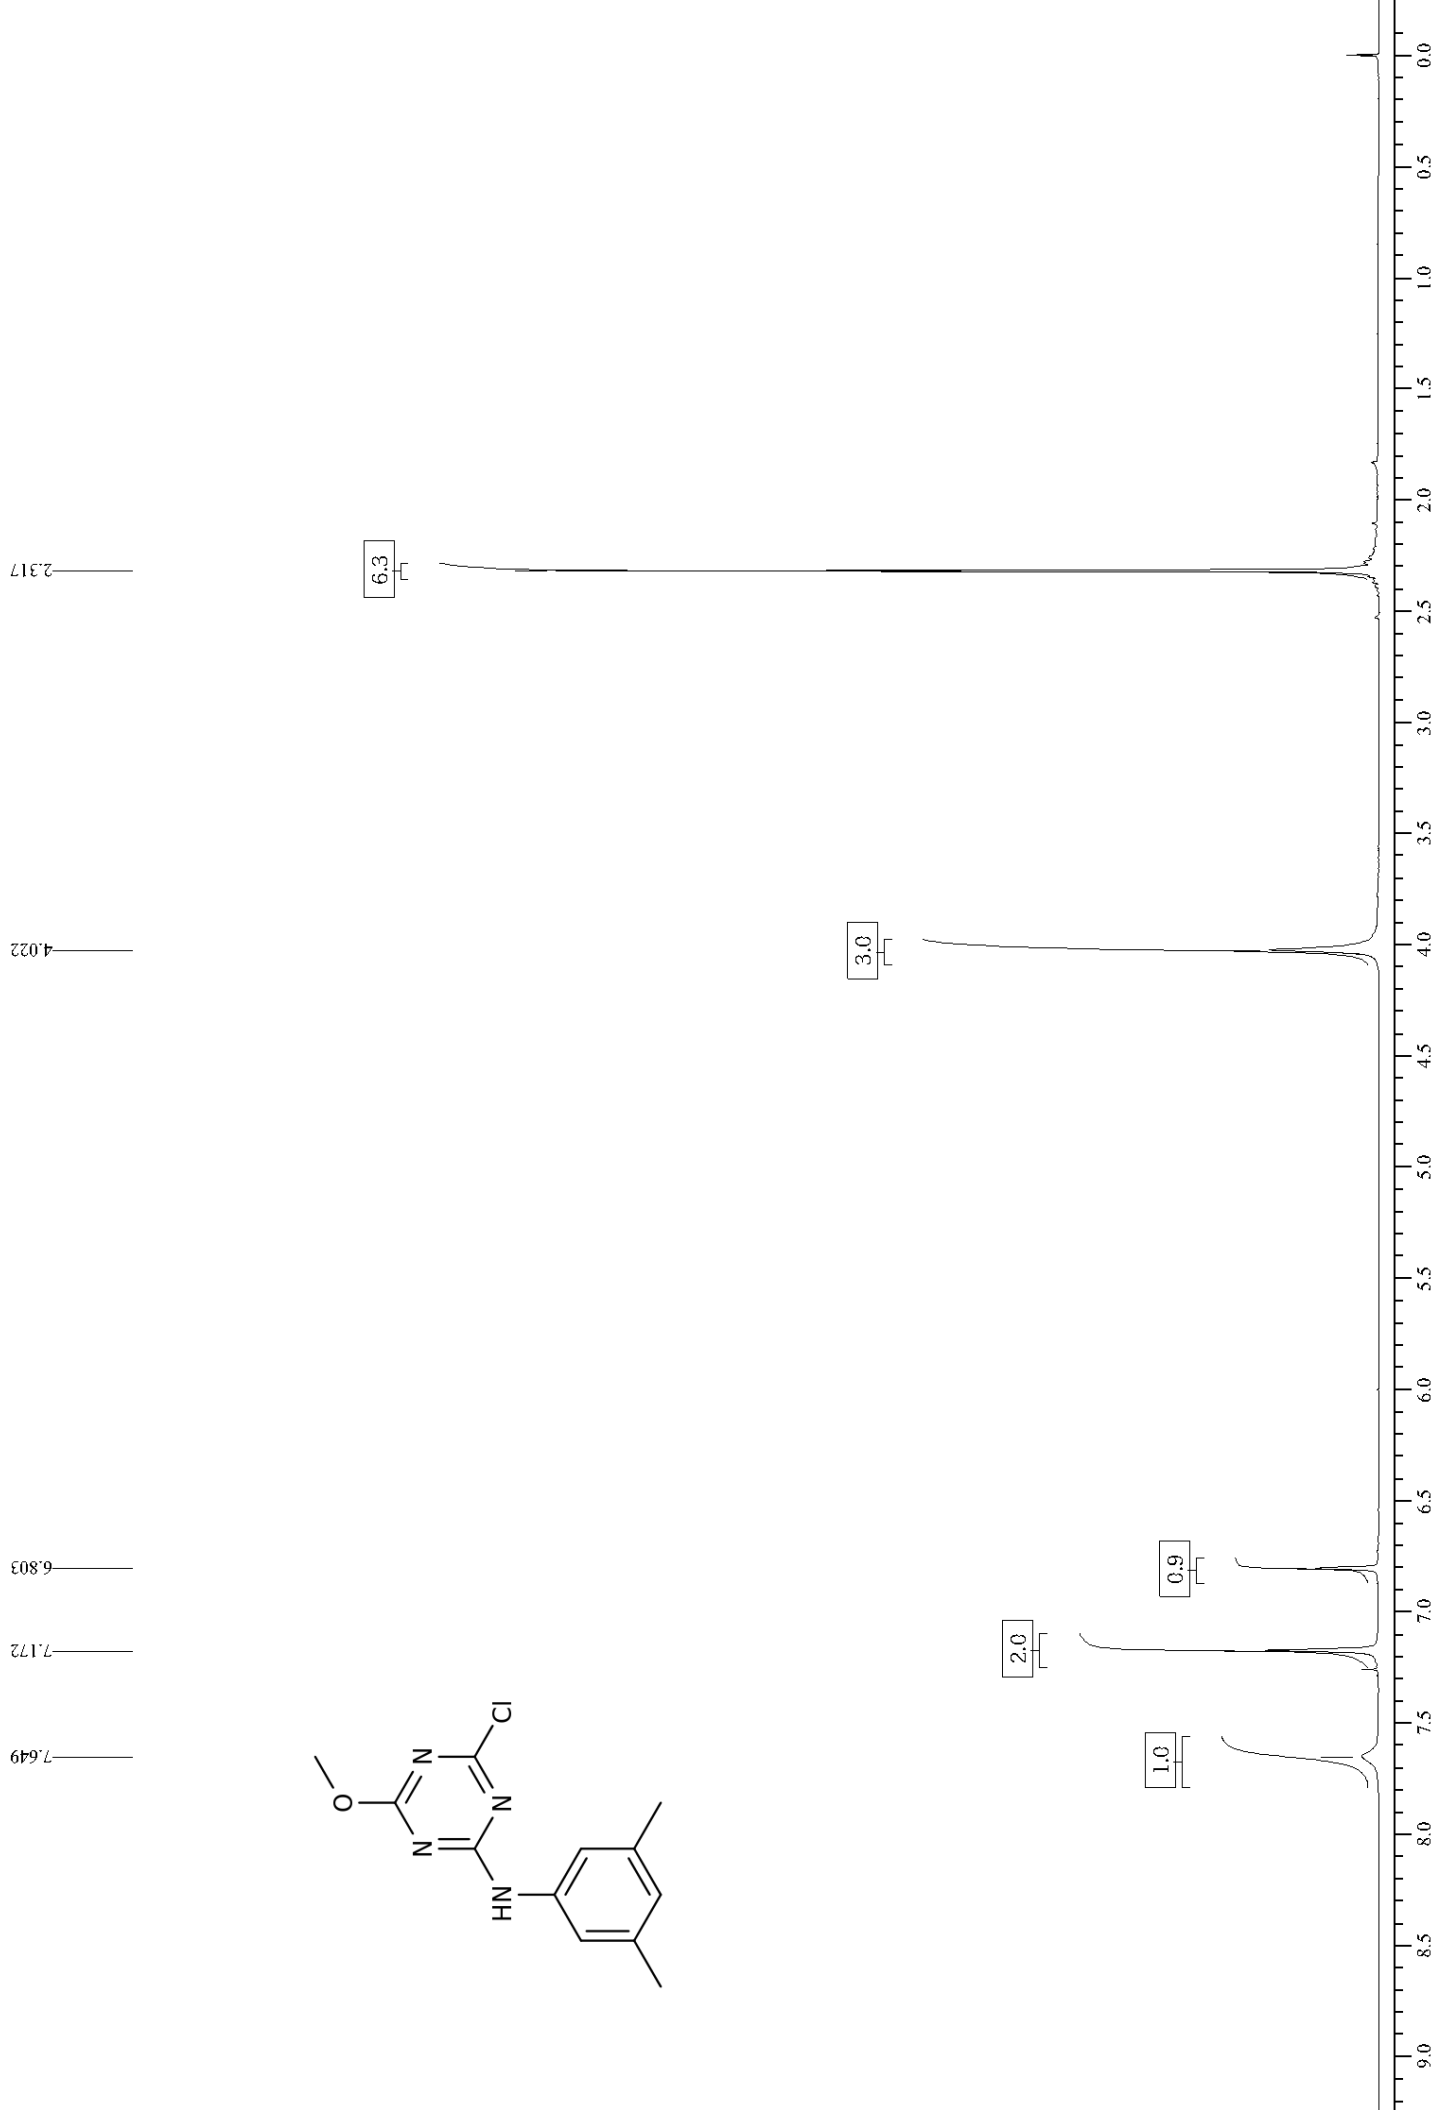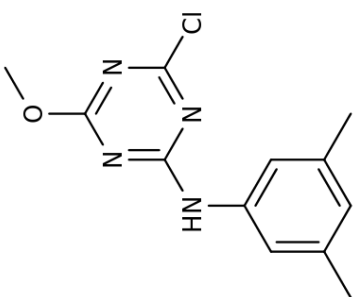

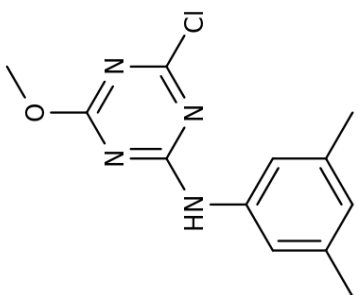

171.498  
170.602  
165.238

138.748  
136.518

126.687

118.889

55.503

21.416

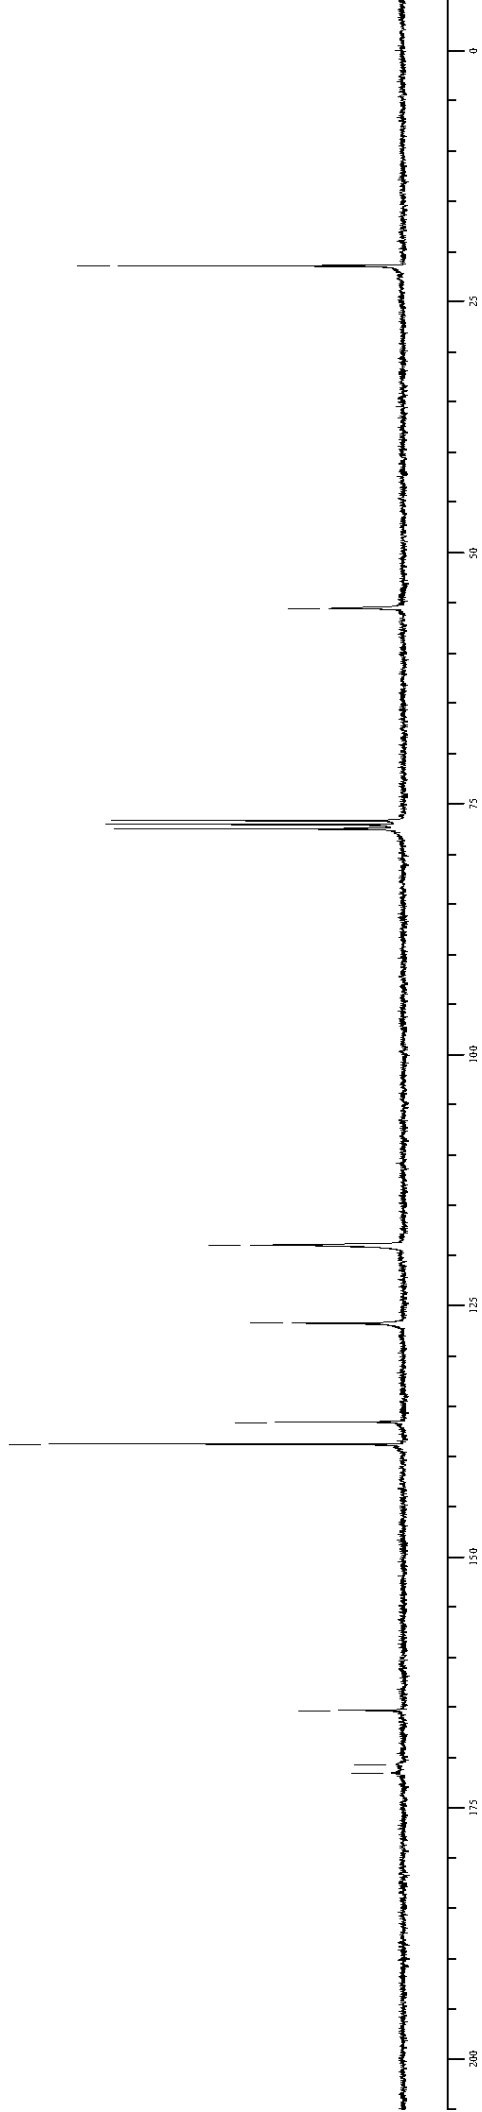

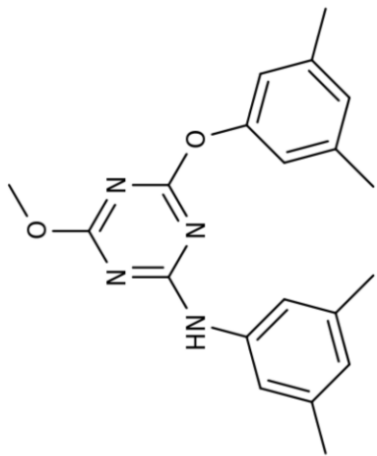

**6**  
363 K

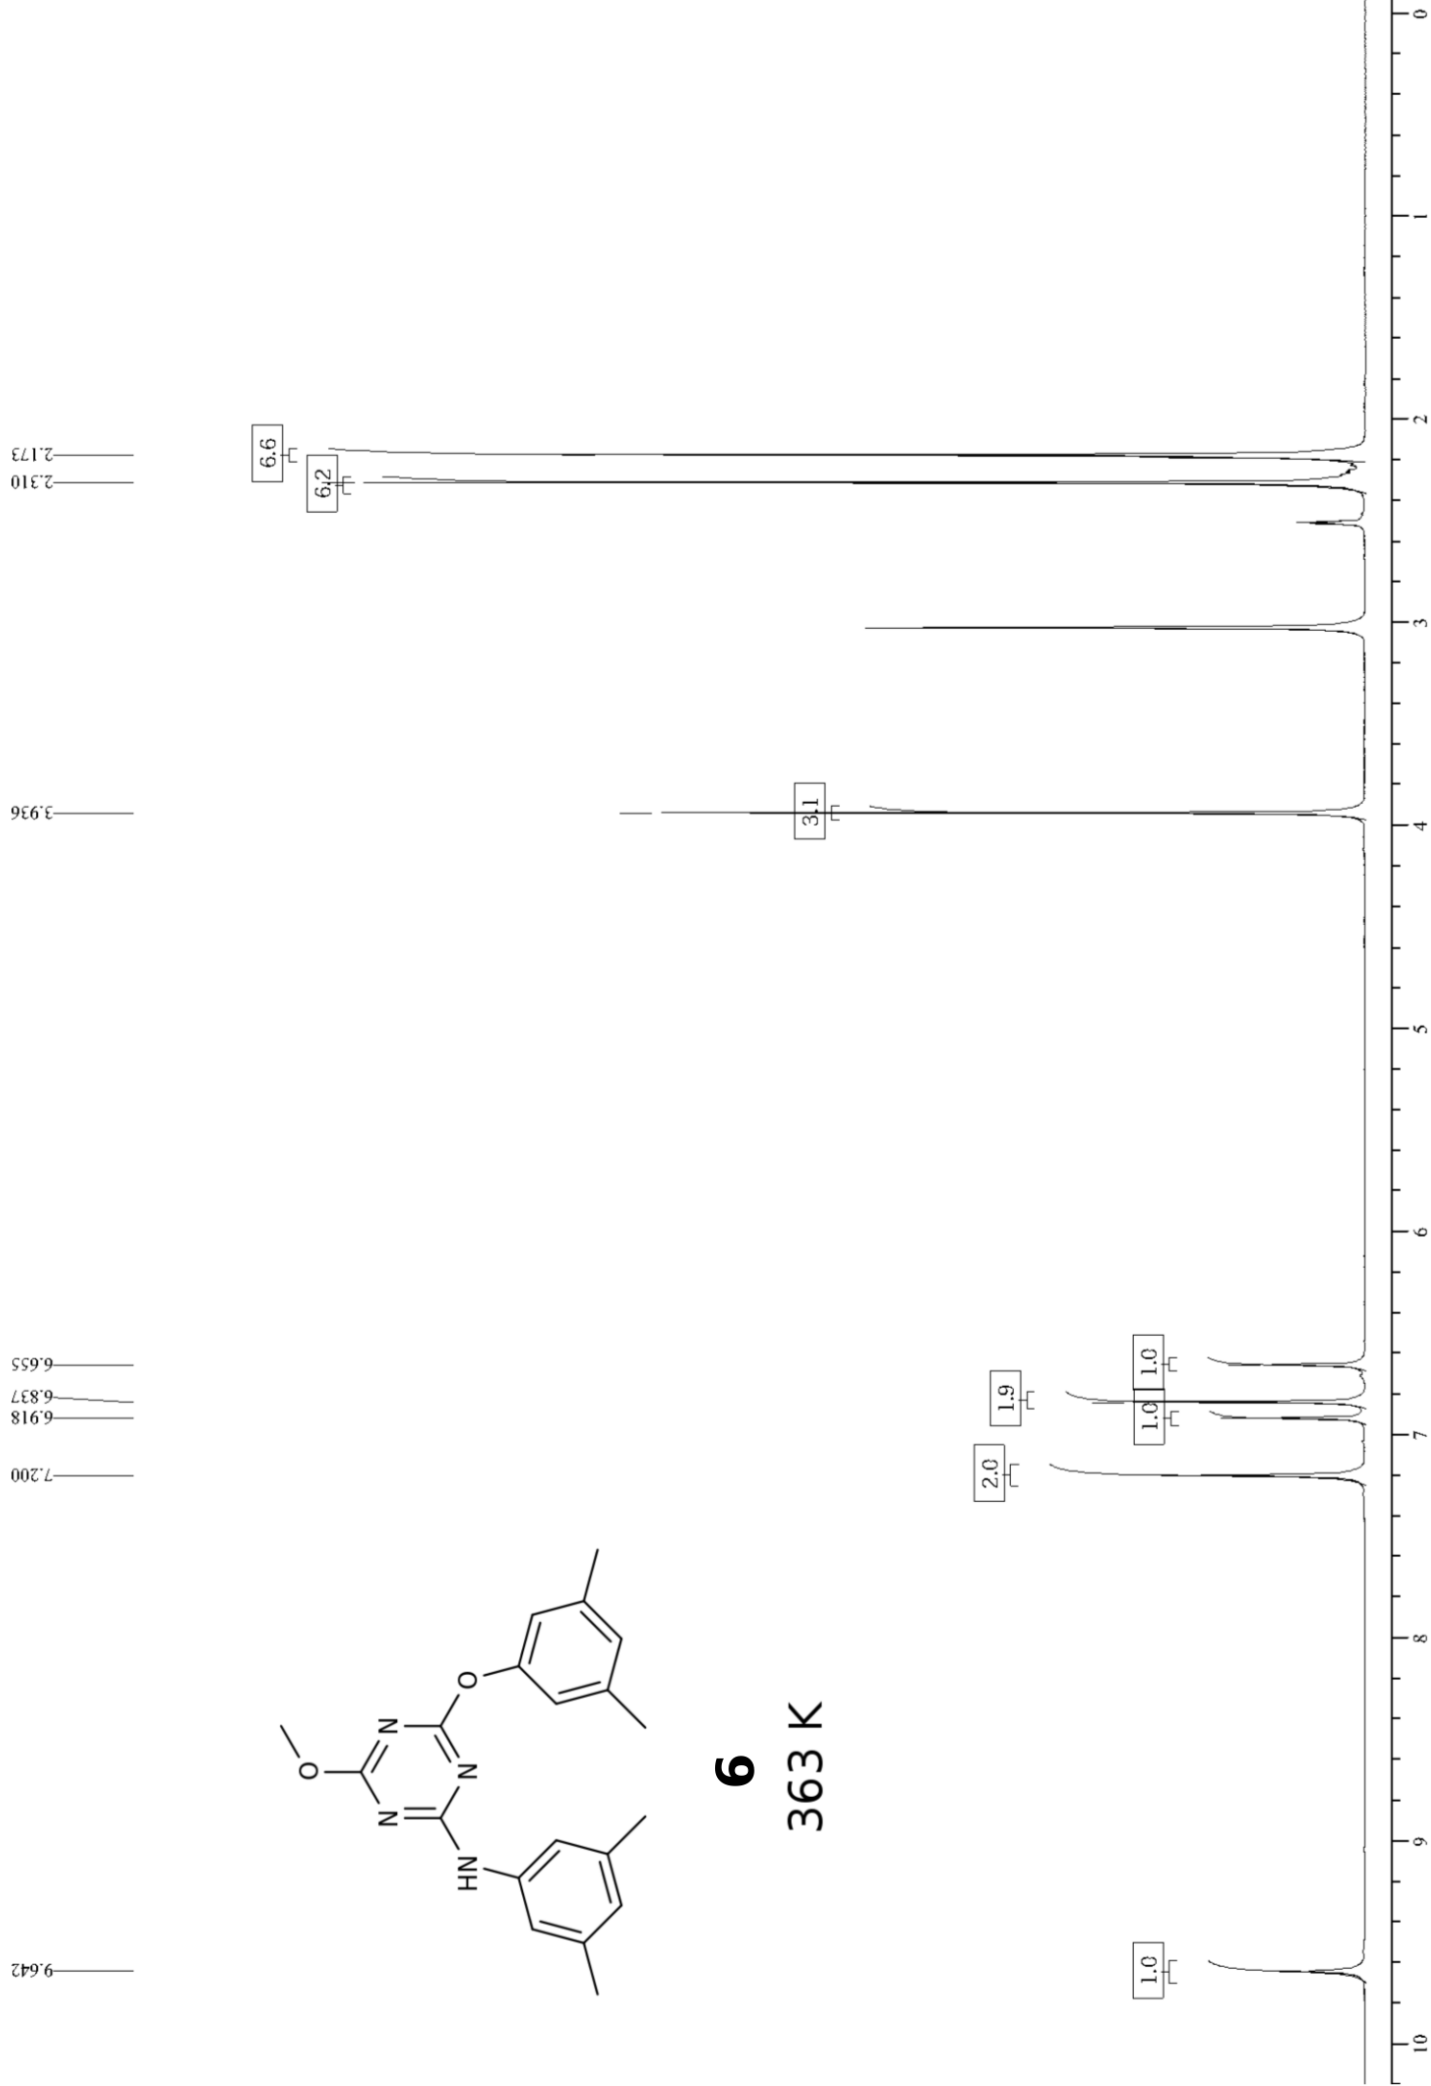



21.245

55.033

117.922  
118.836  
119.773

124.857  
127.551

137.807  
138.984  
139.305

152.372

166.189  
172.391  
172.624

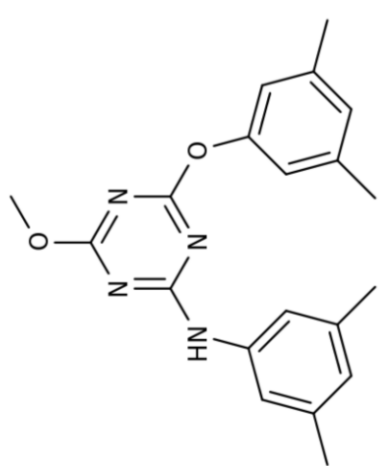

9

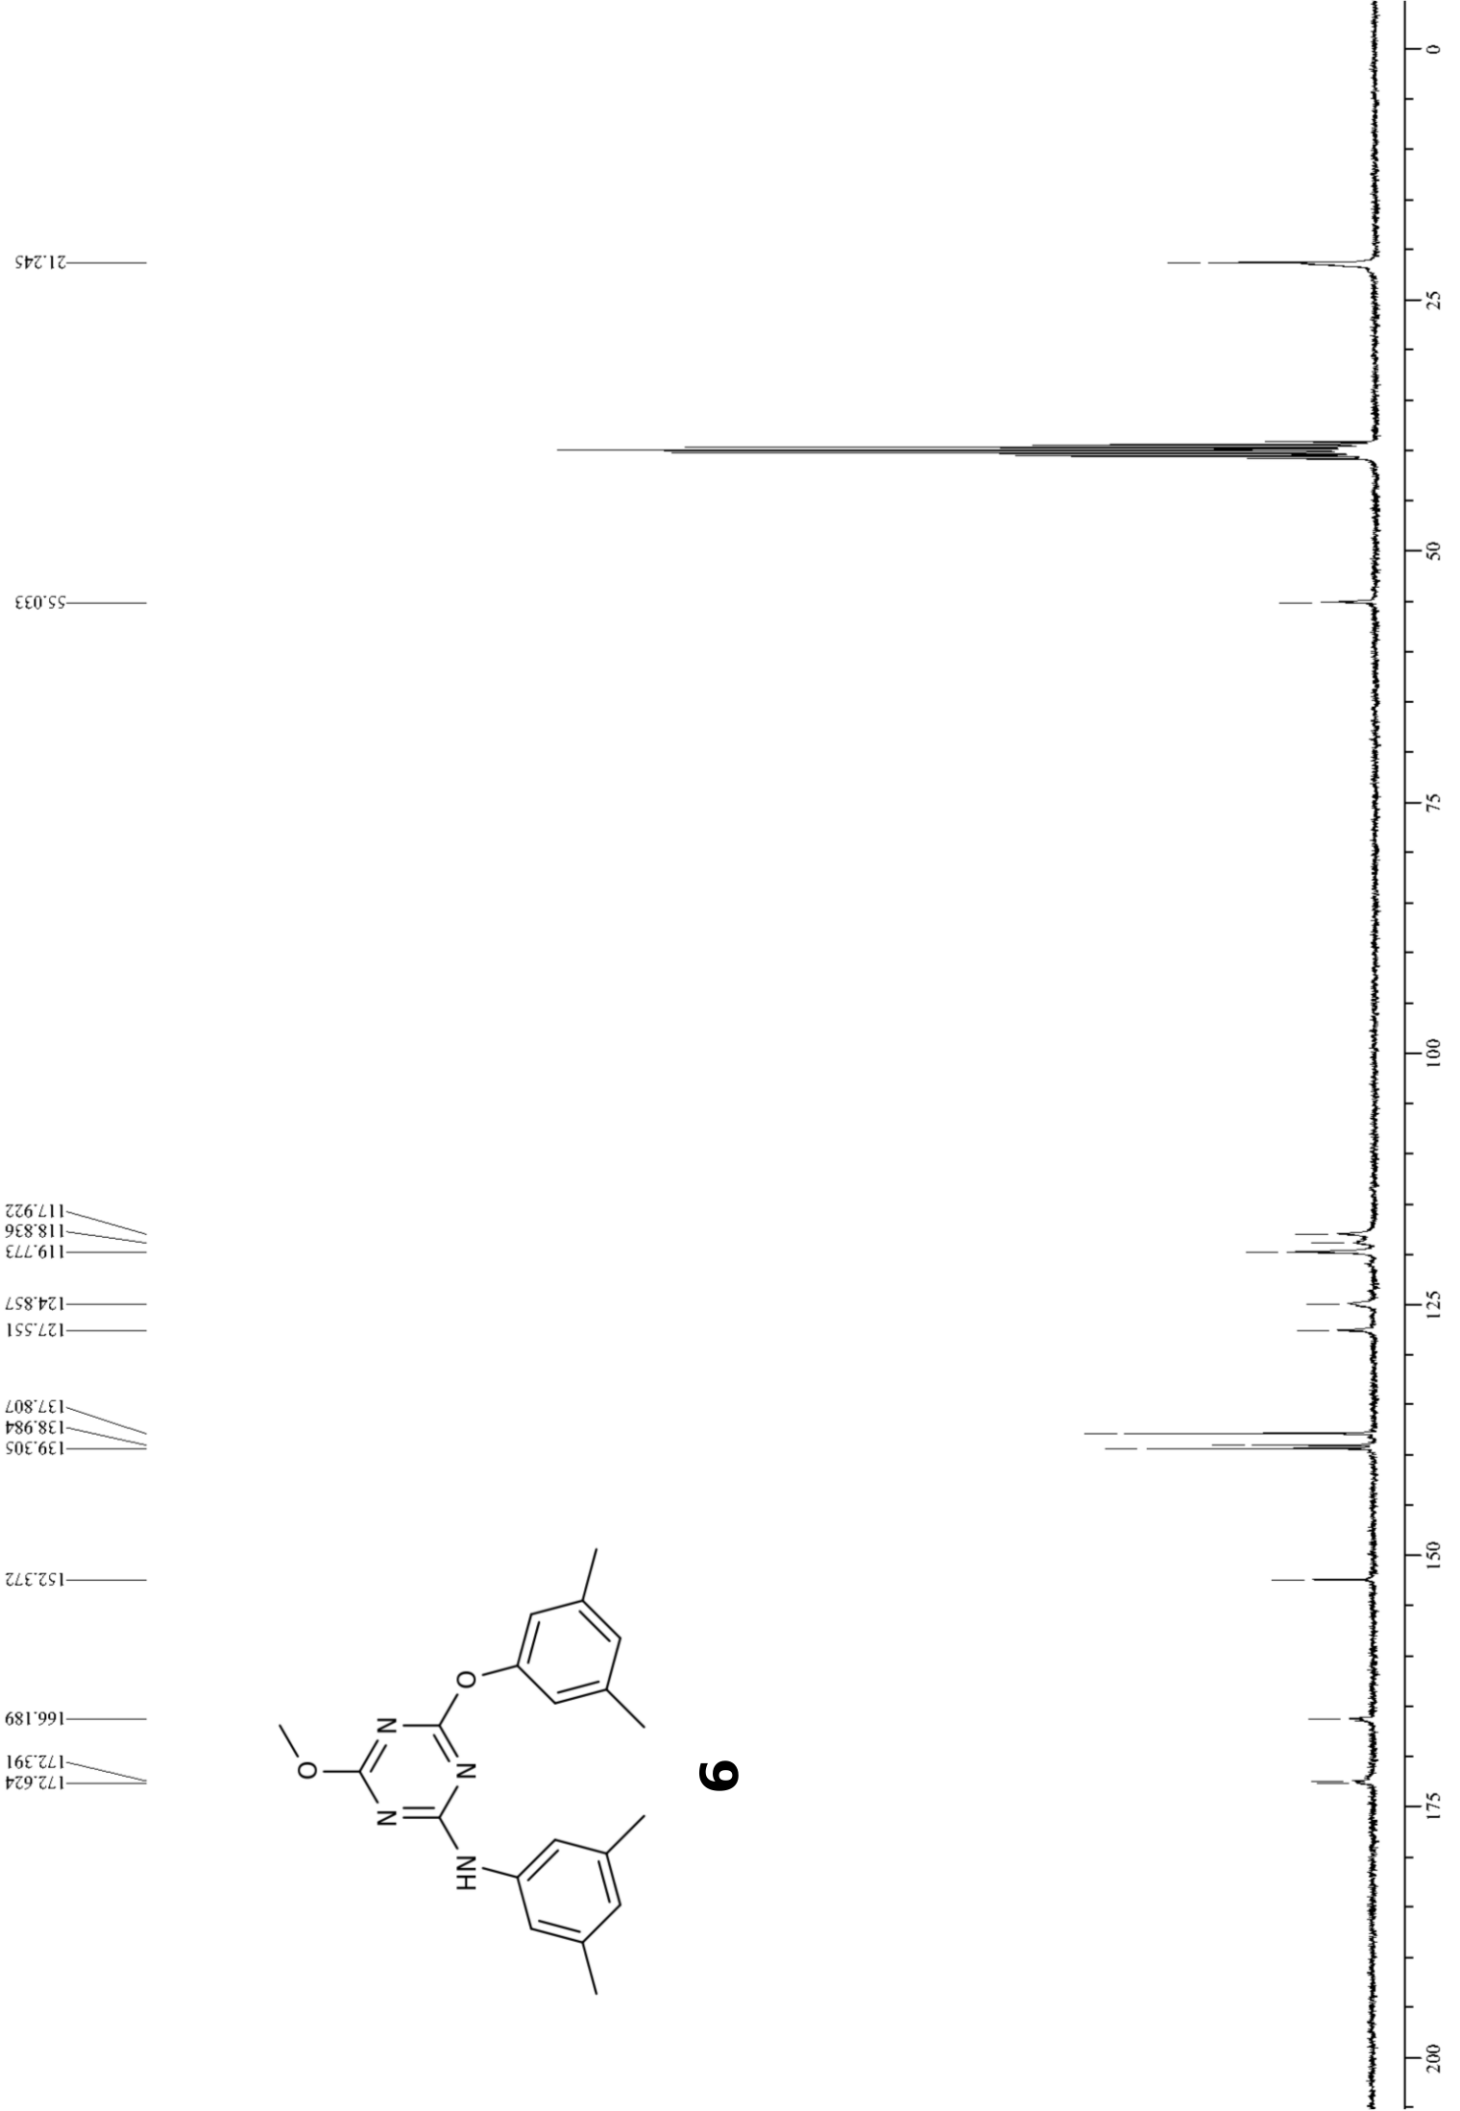

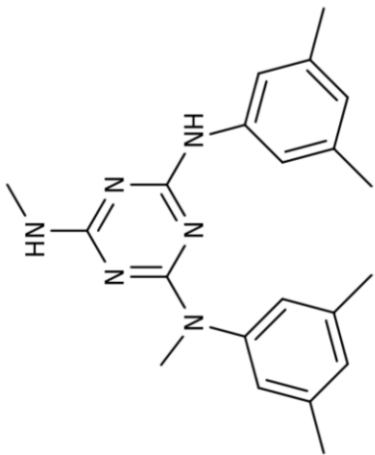

**7**

363 K

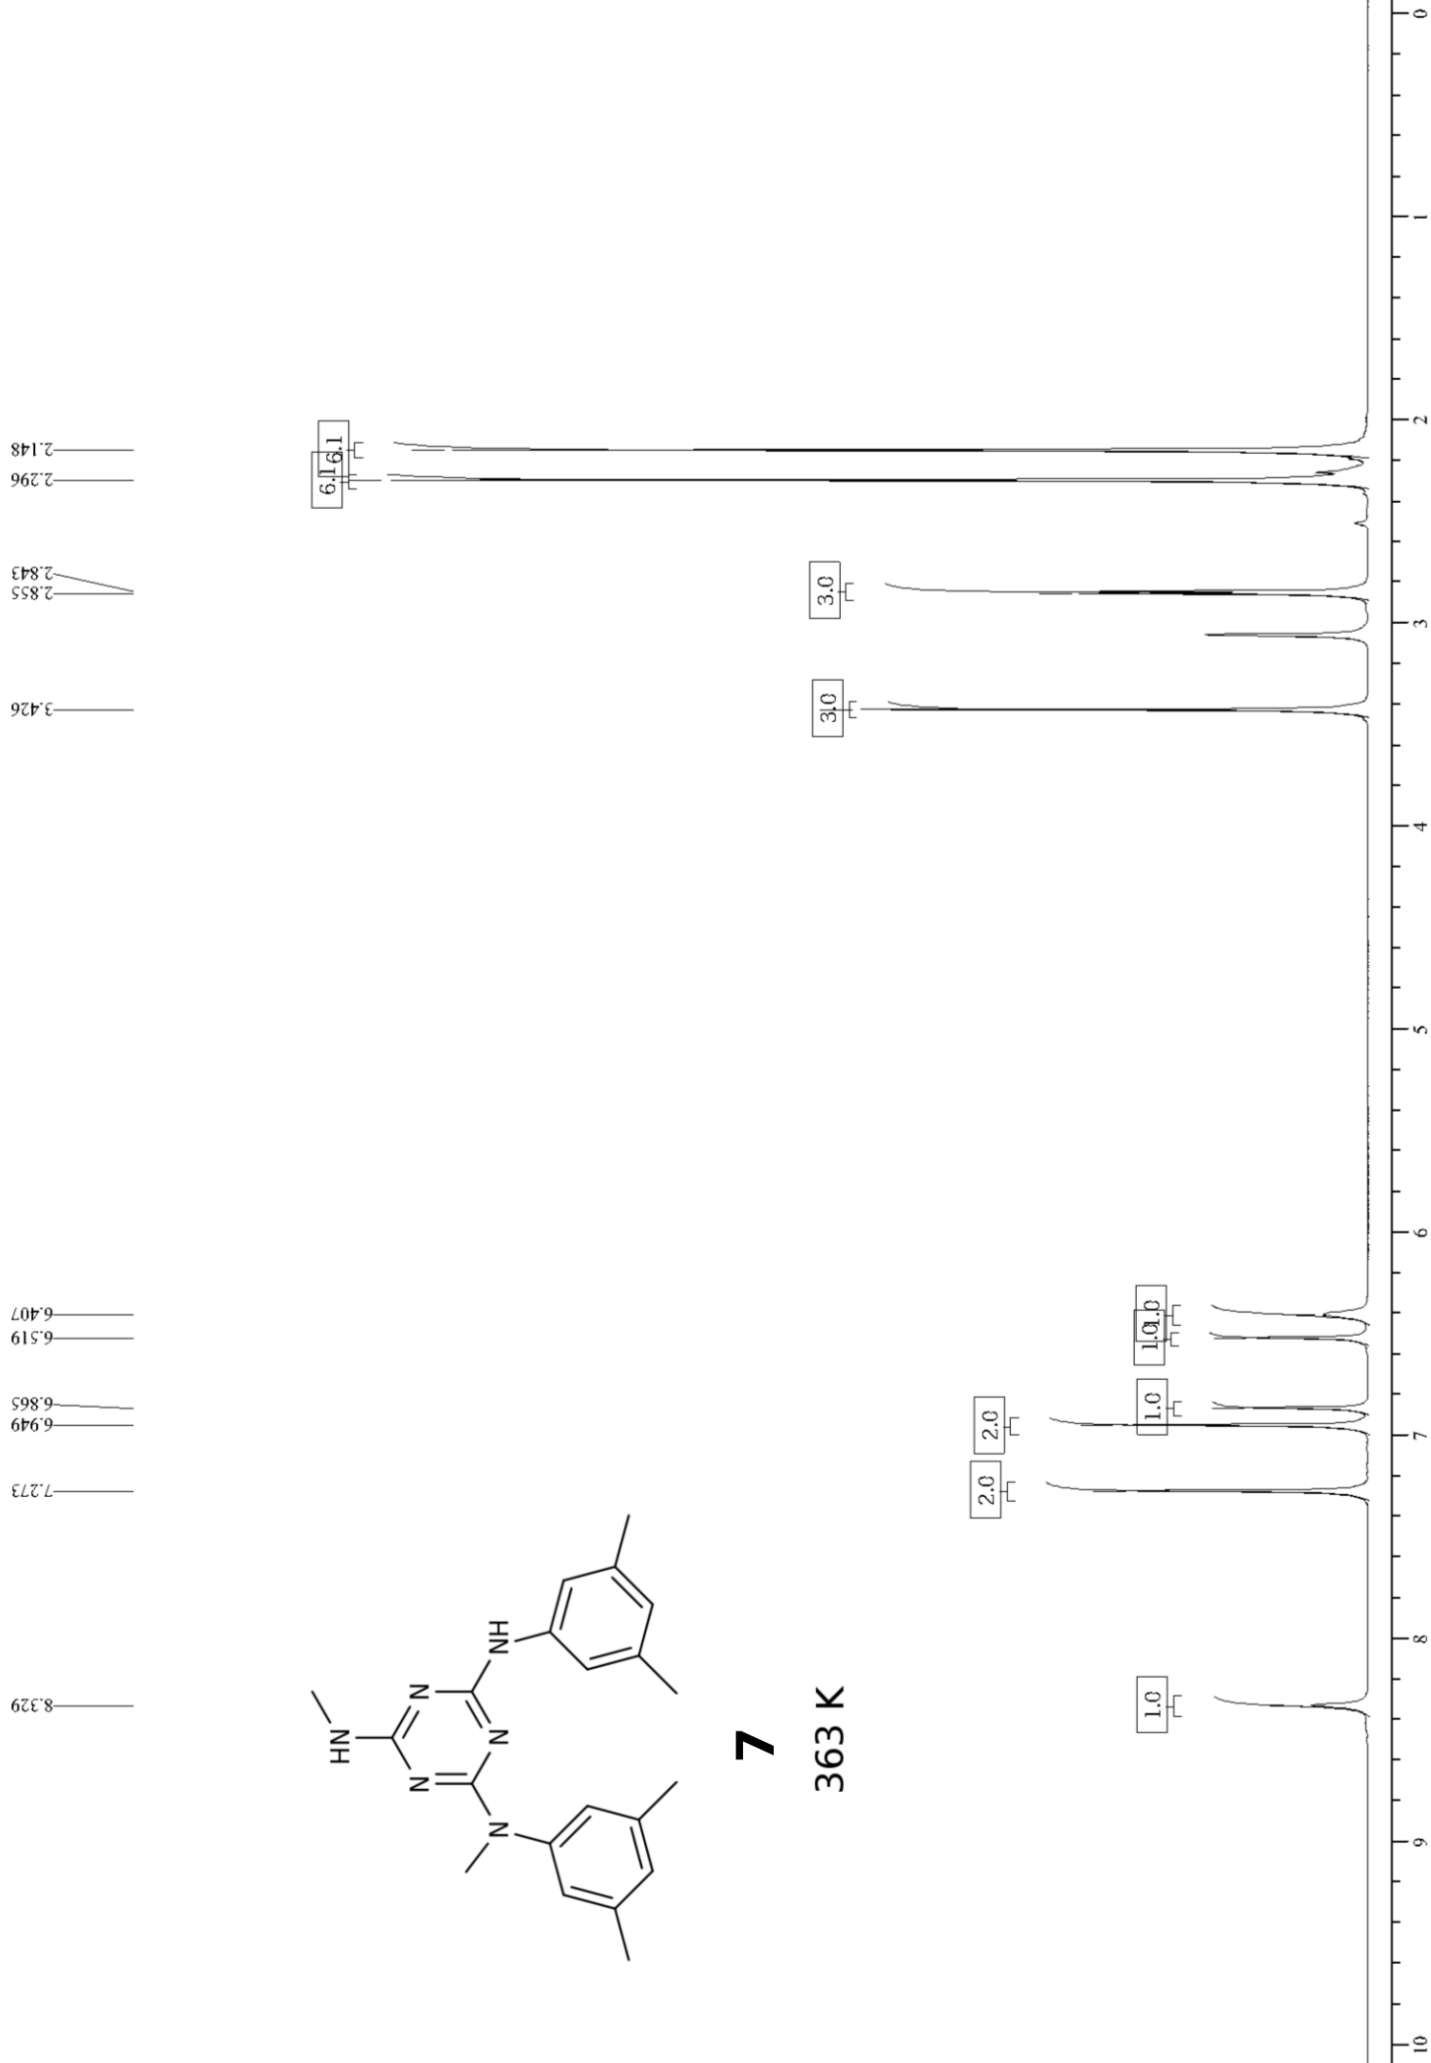

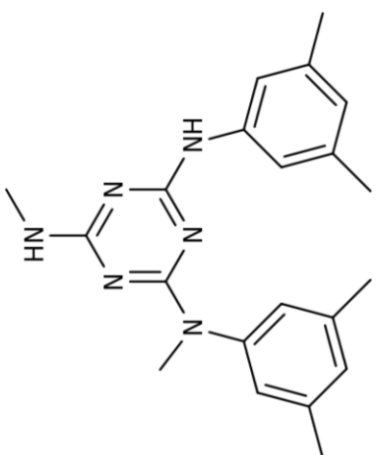

7

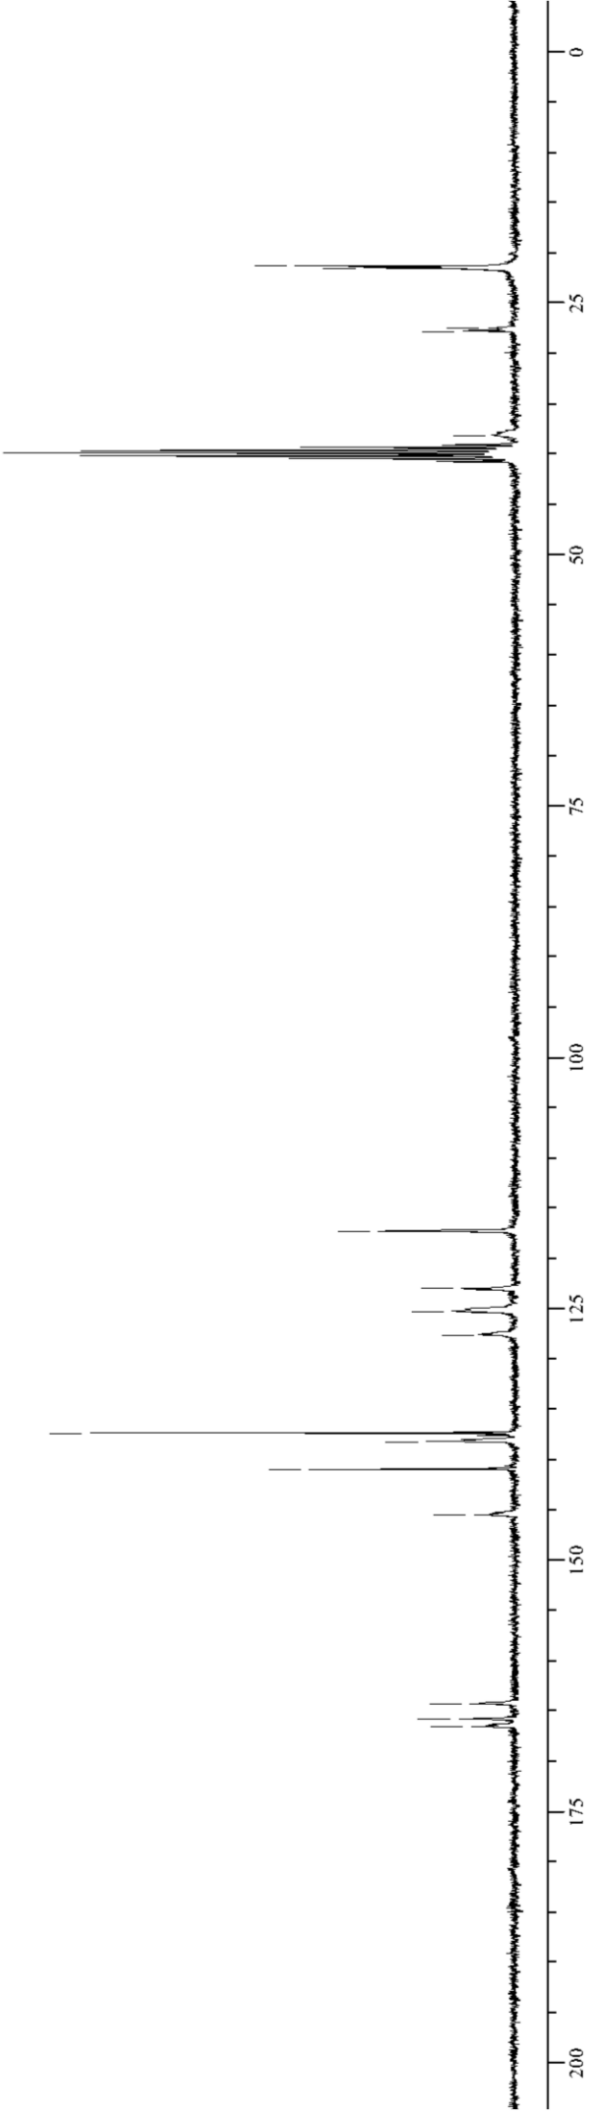

21.321  
21.482  
27.442  
27.724  
38.142

117.253  
122.997  
125.220  
127.503  
137.342  
138.188  
140.930  
145.499

164.273  
165.750  
166.542

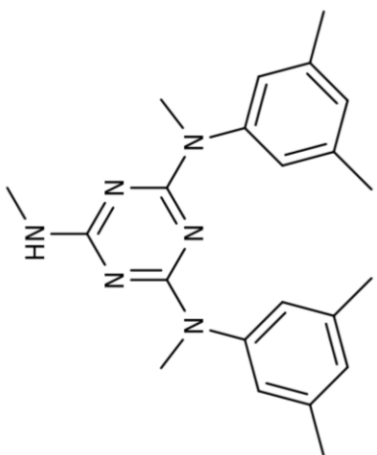

8

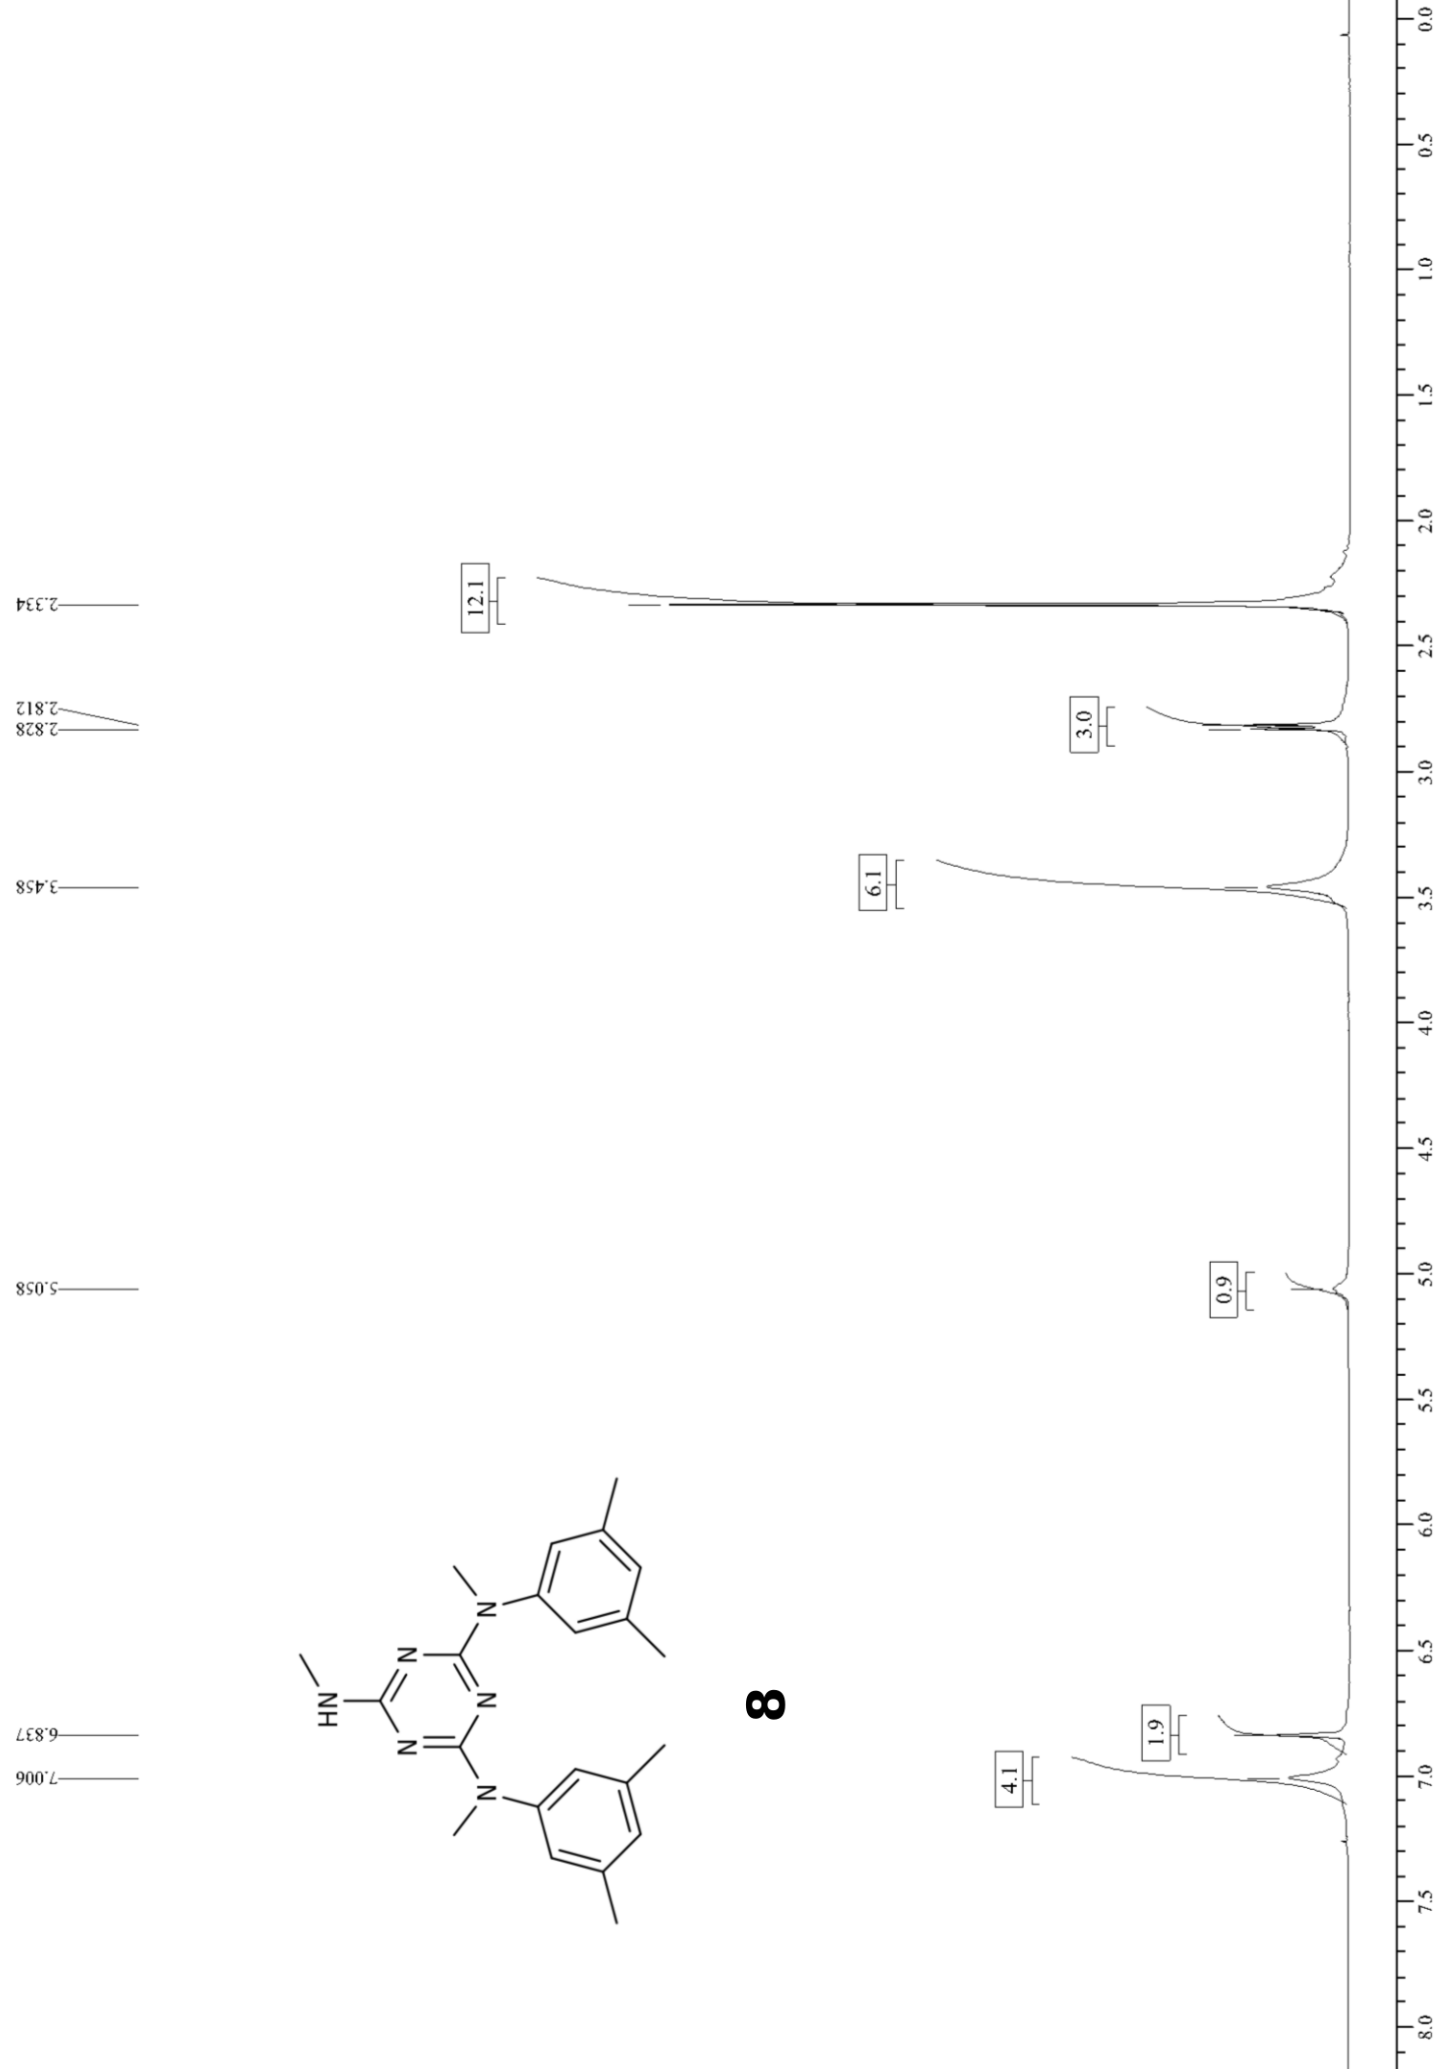

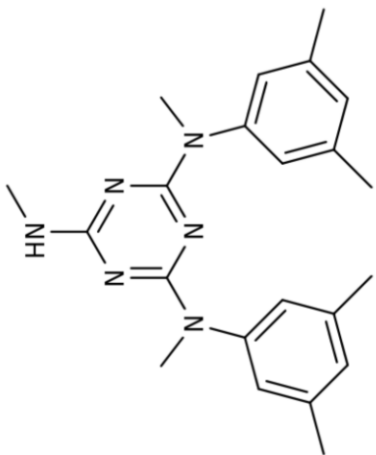

8

21.347  
27.397  
37.423

124.208  
126.686  
137.708  
144.845  
165.561  
166.660

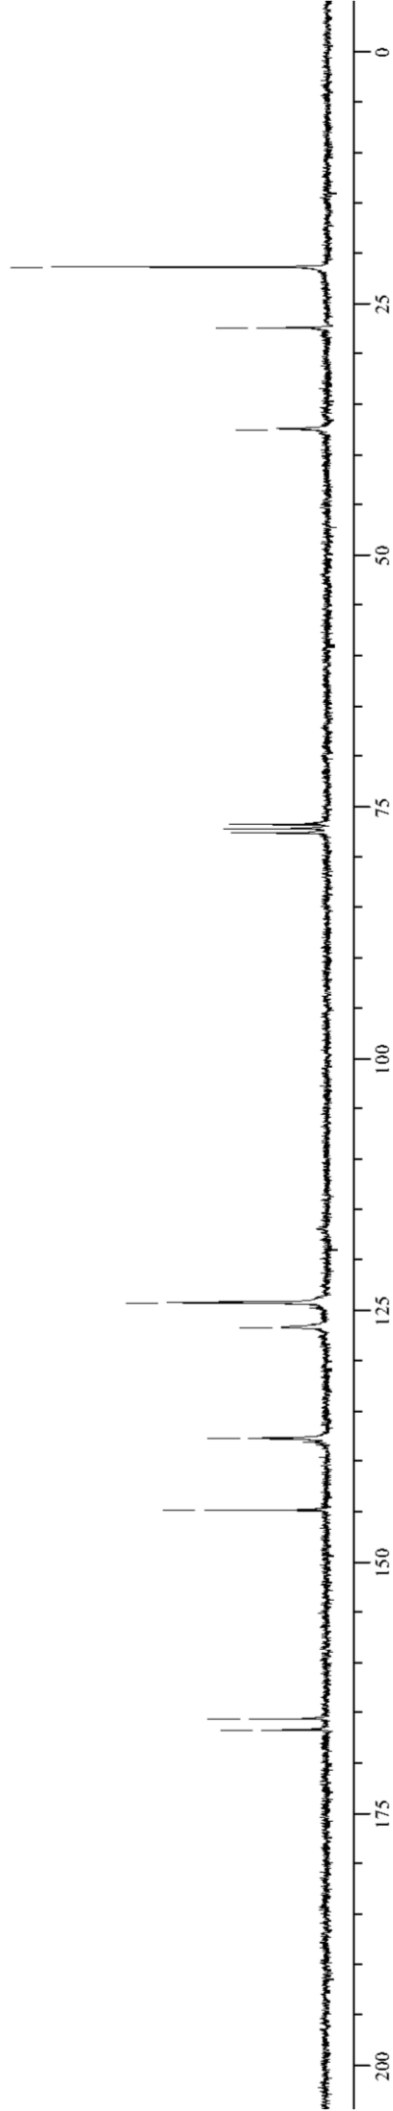

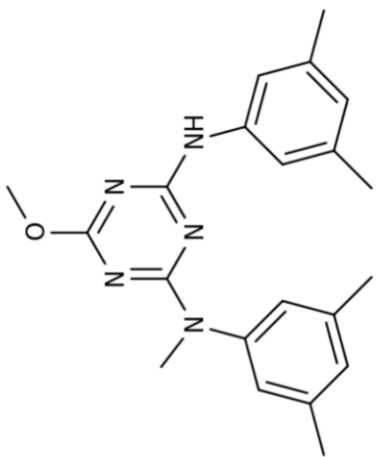

**9**

363 K

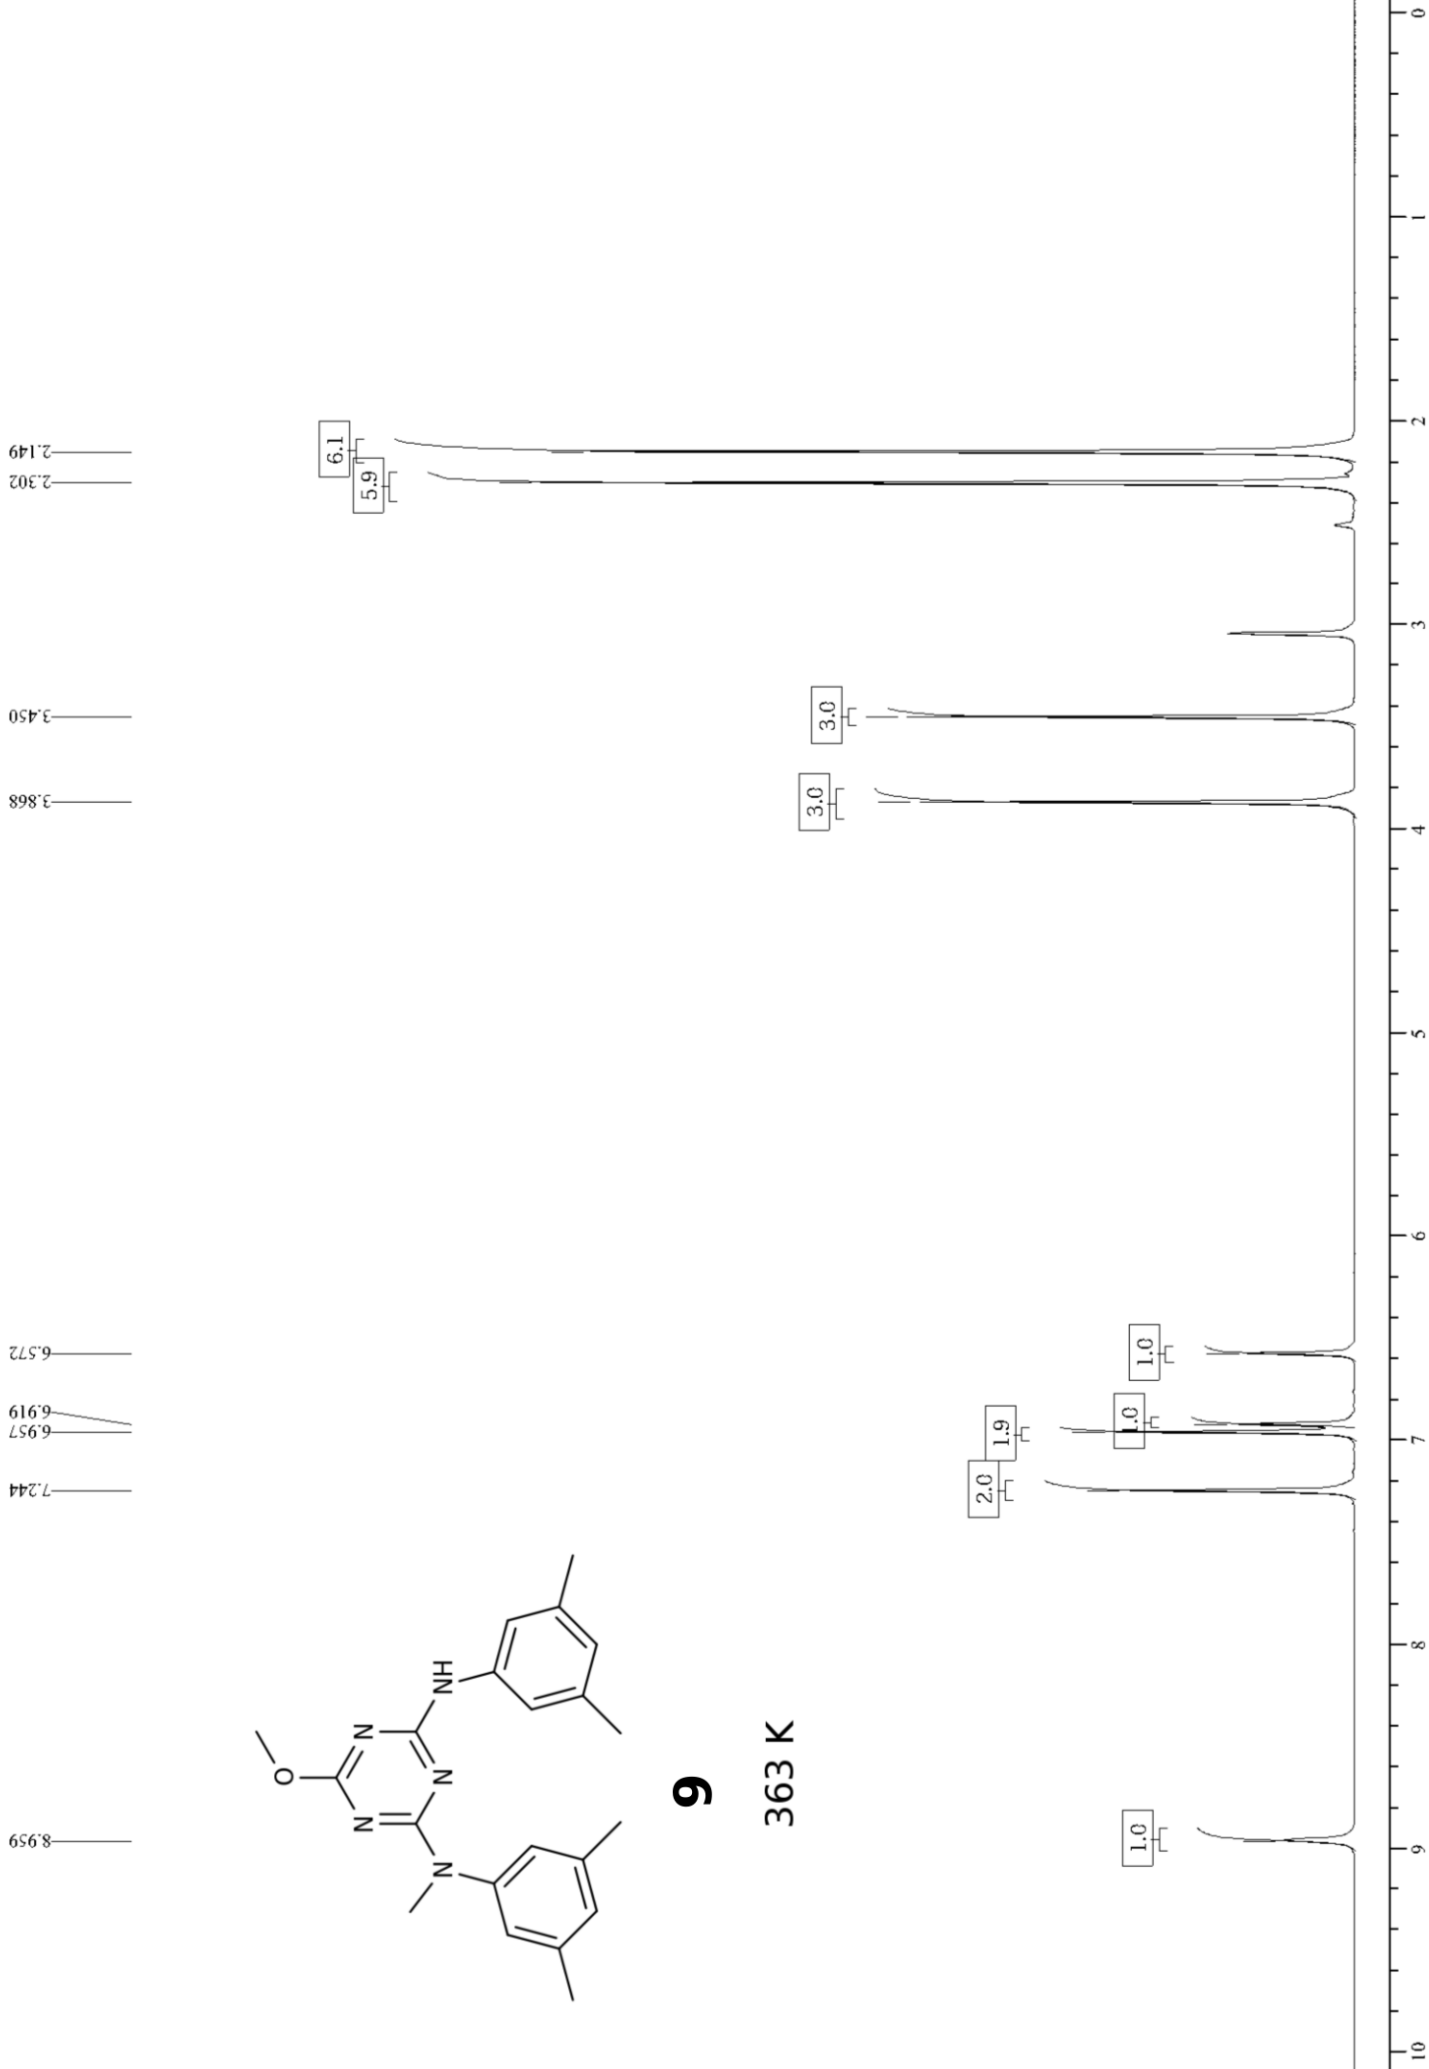

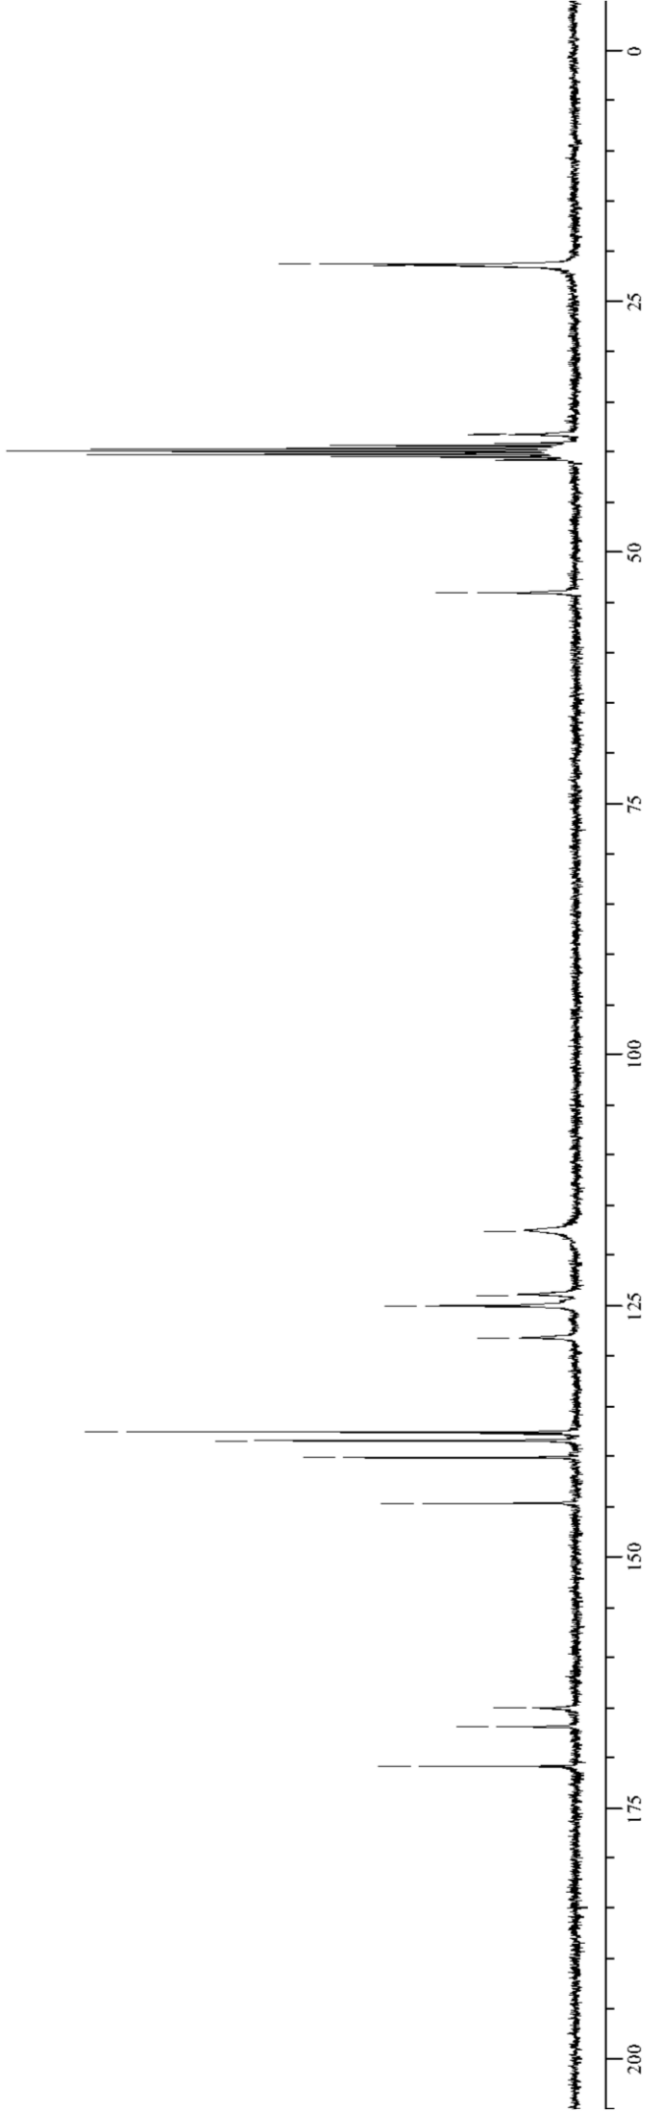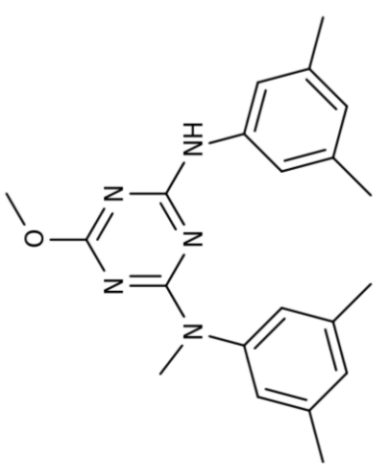

6

- 170.822
- 166.878
- 165.003
- 144.621
- 140.077
- 138.394
- 137.542
- 128.180
- 125.000
- 123.862
- 117.454
- 53.997
- 38.257
- 38.170
- 21.405
- 21.259

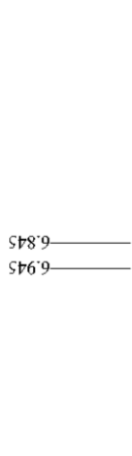

6.945  
6.845

3.814

3.451

2.310

10

3.9

2.0

3.0

6.1

12.6

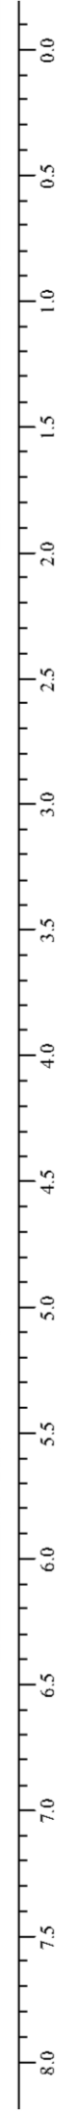



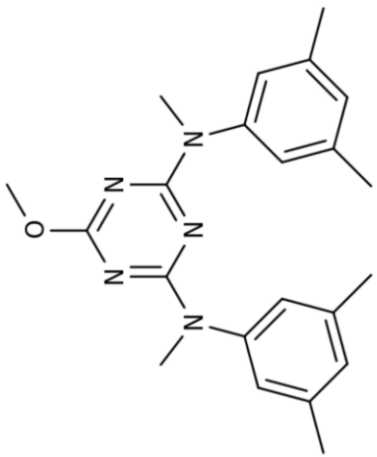

10

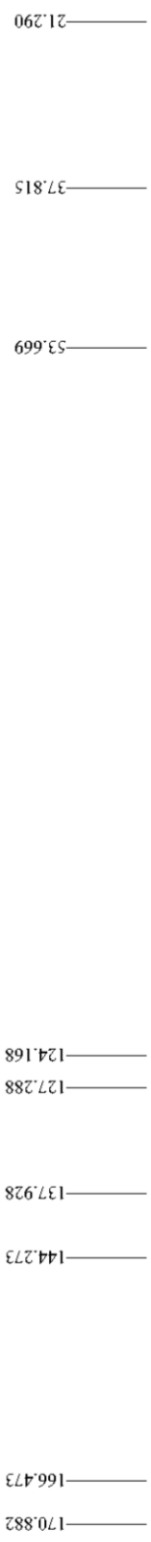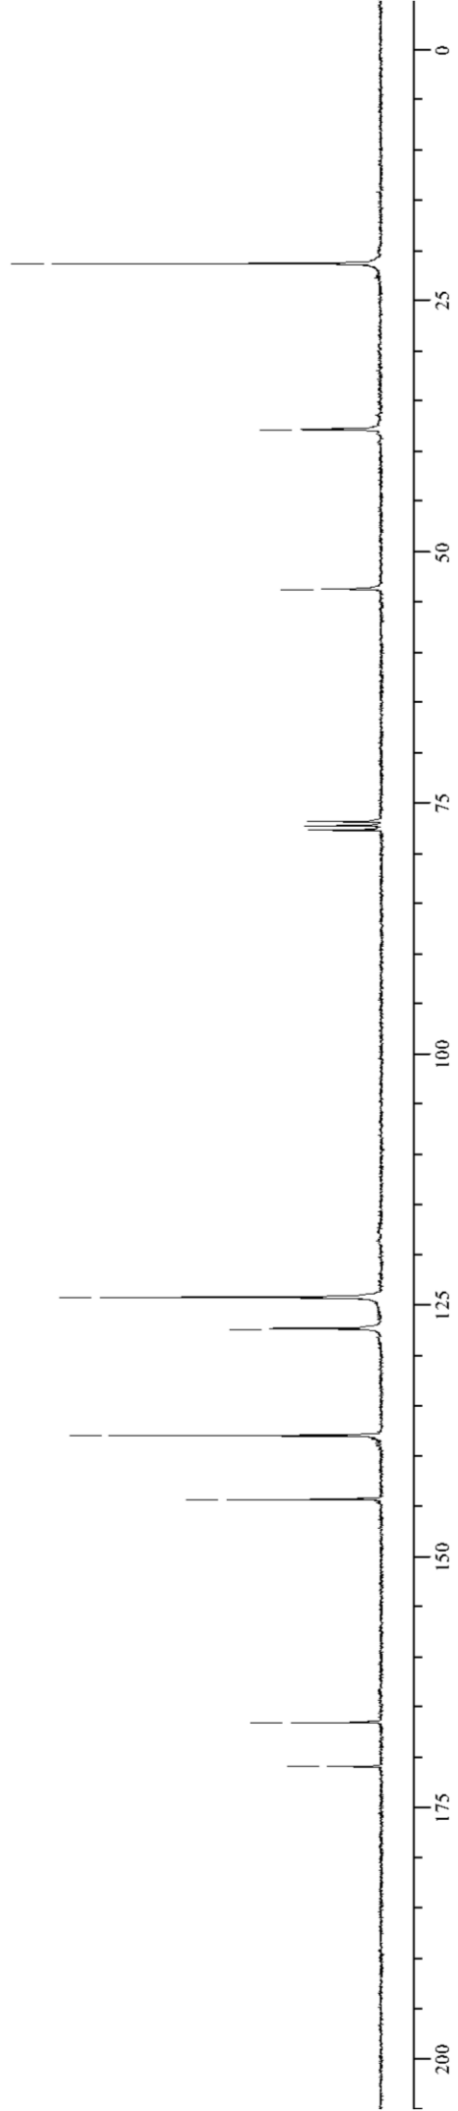

6.973  
6.911  
6.837  
6.799  
6.750

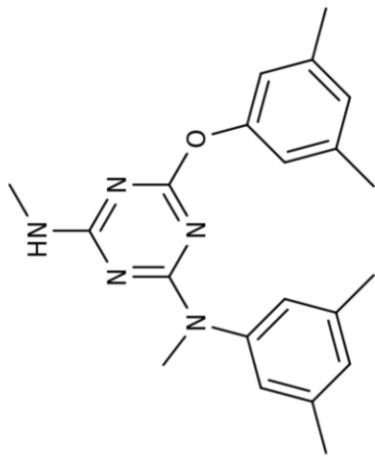

**11**

363 K

3.375  
2.761  
2.750  
2.263

12.1

2.9

3.0

1.9 1.9

1.0 1.0

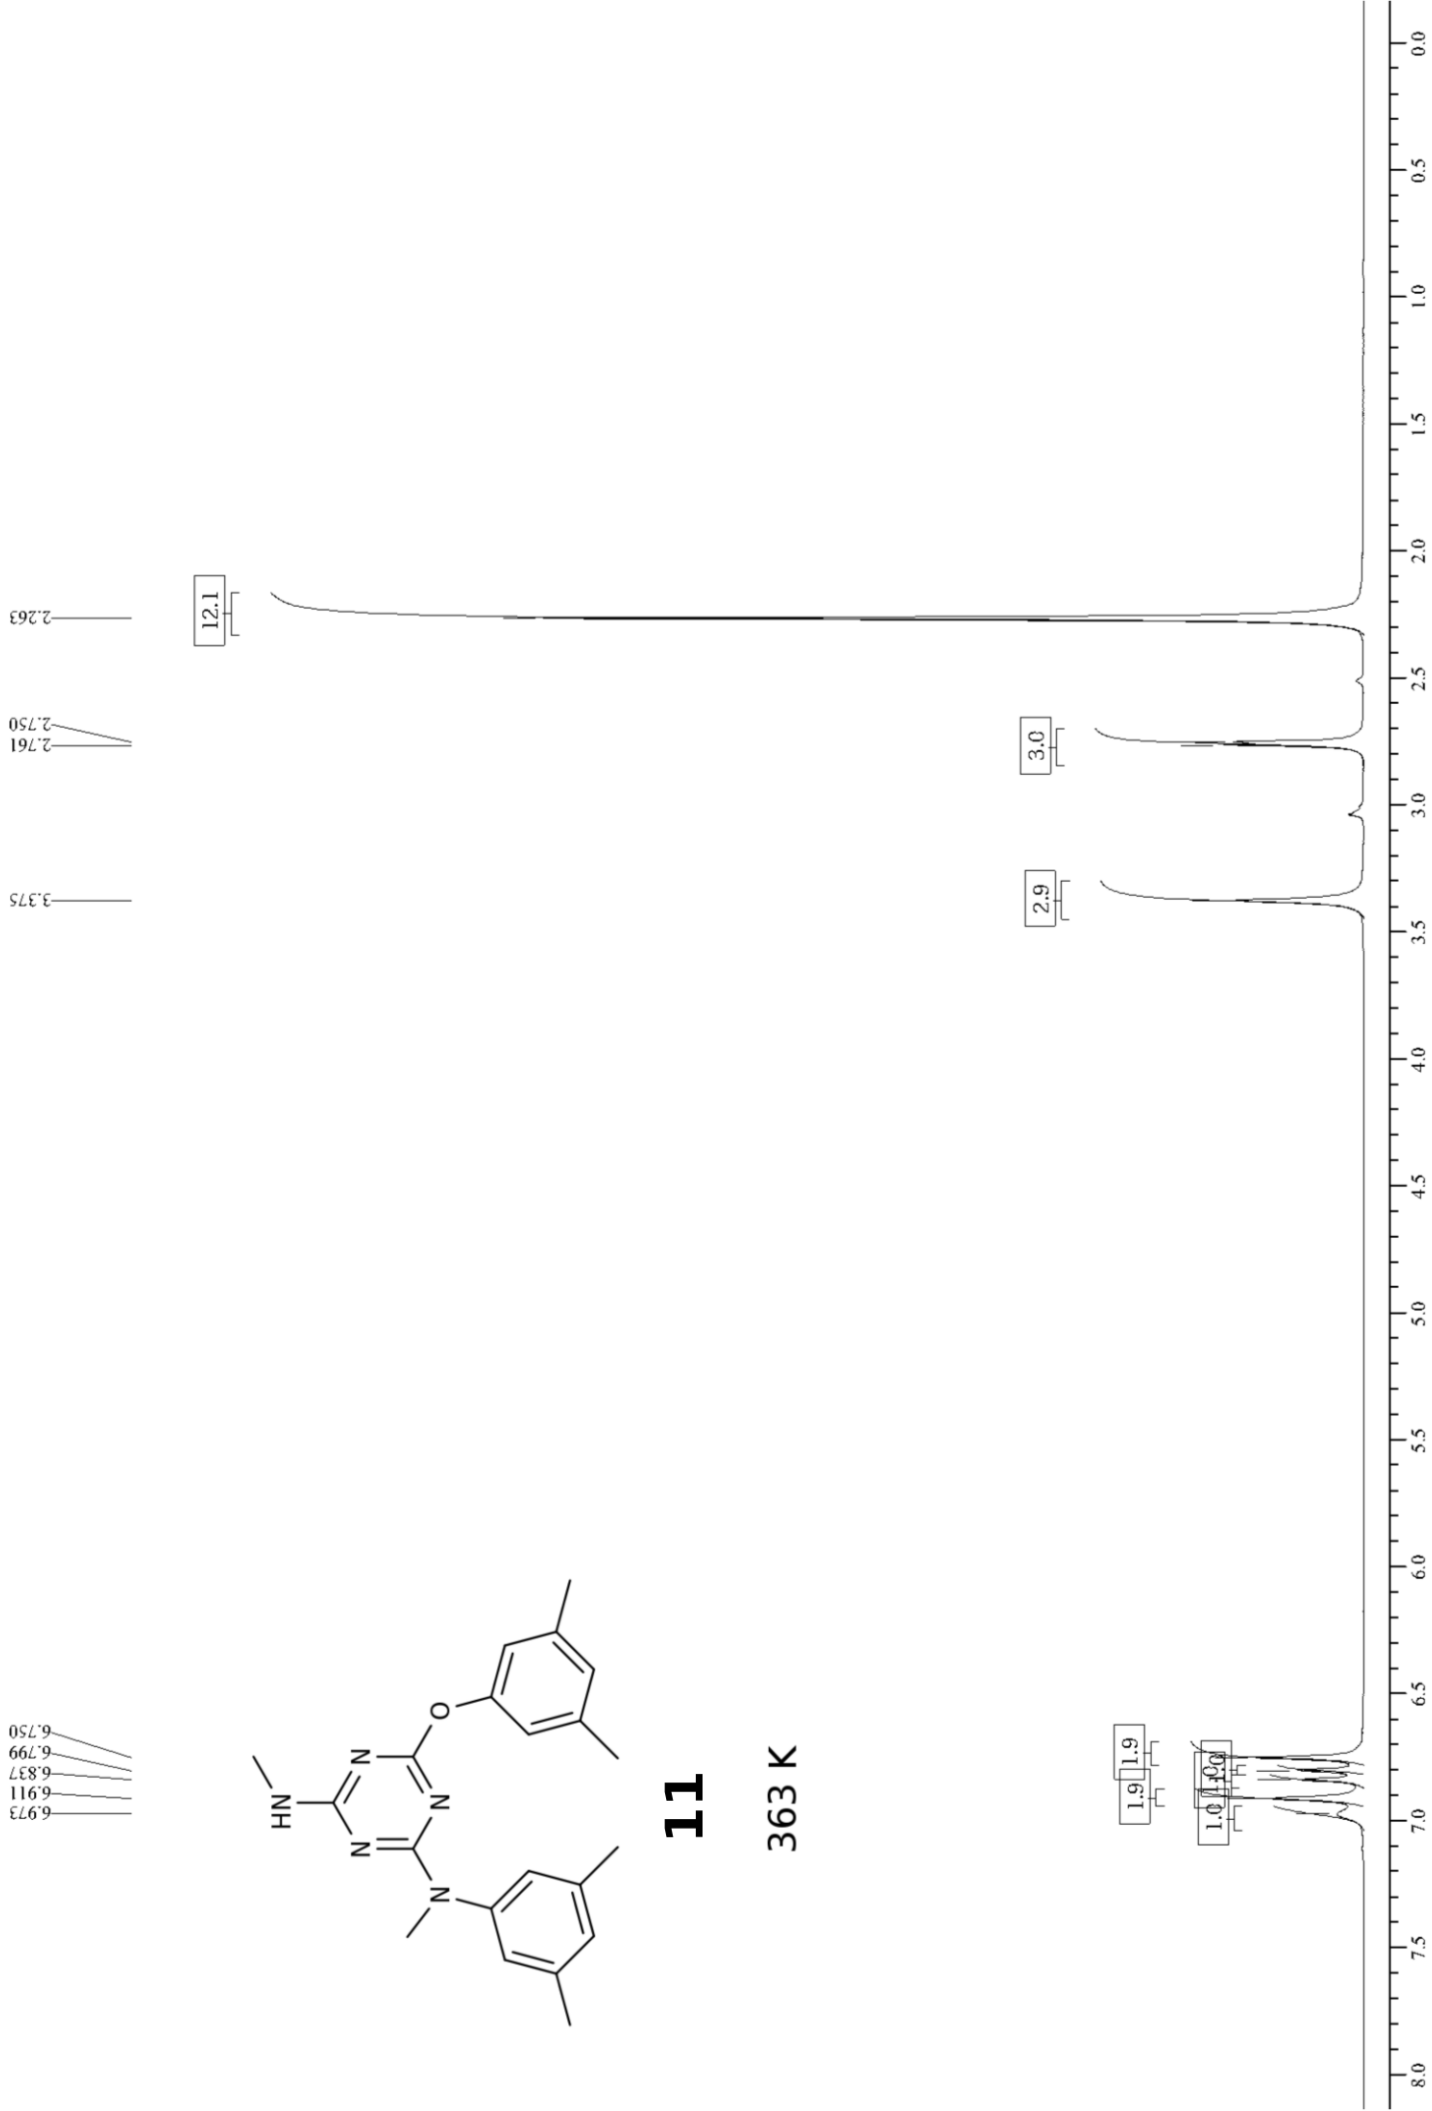

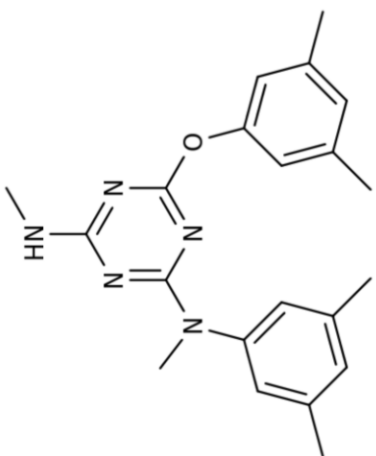

11

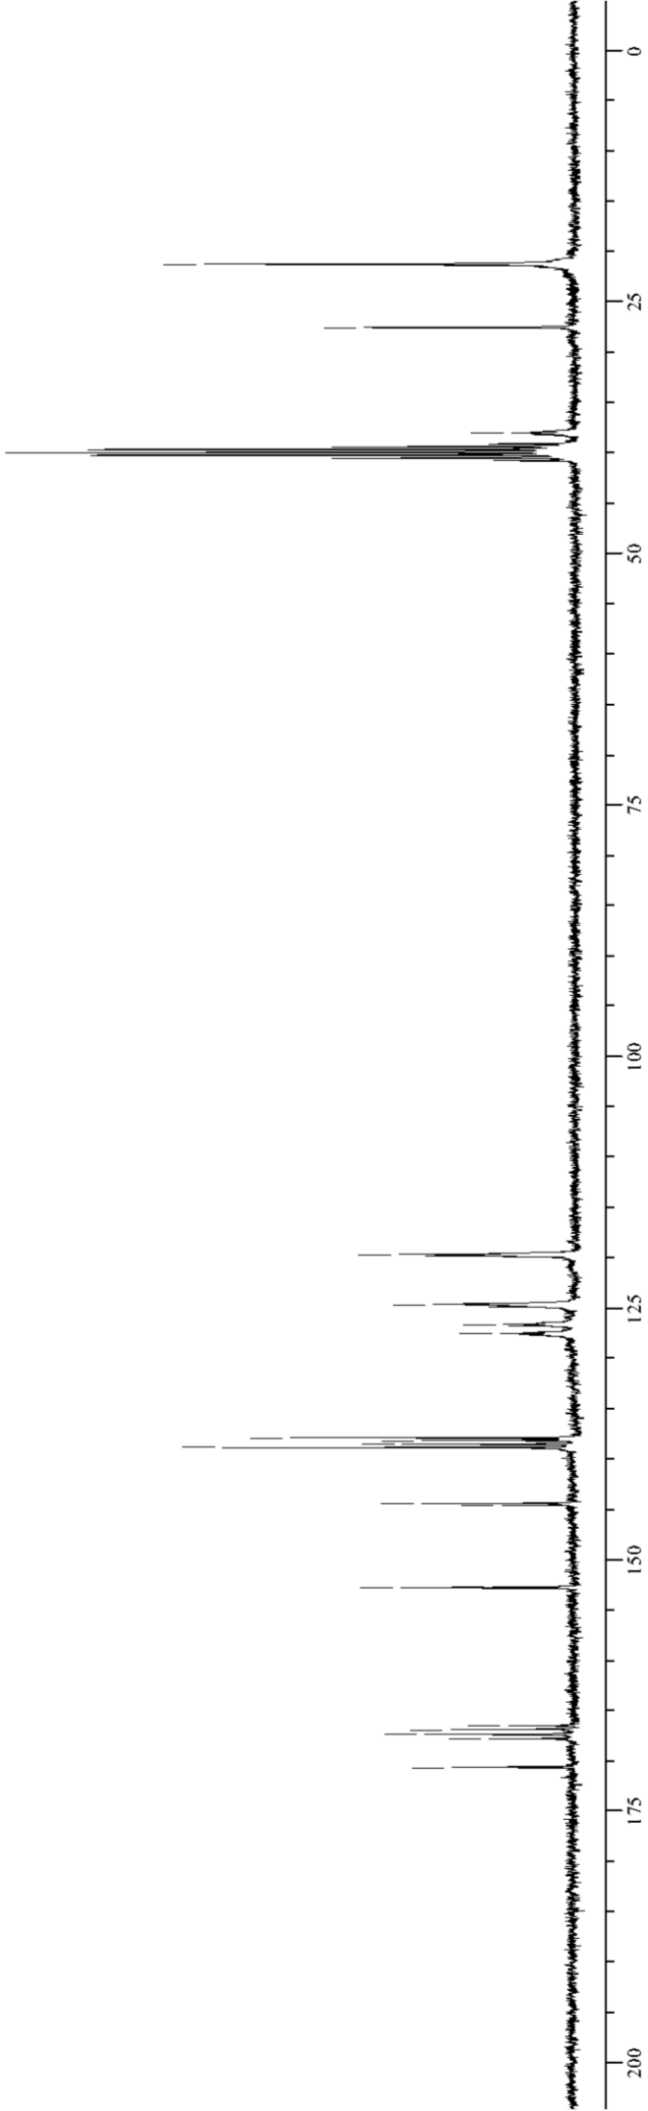

7.978  
7.499  
7.229

170.583  
167.788  
167.334  
166.851  
166.485  
152.787  
152.665  
144.546  
144.388  
138.851  
138.511  
138.117  
137.865  
127.523  
126.595  
124.603  
119.649

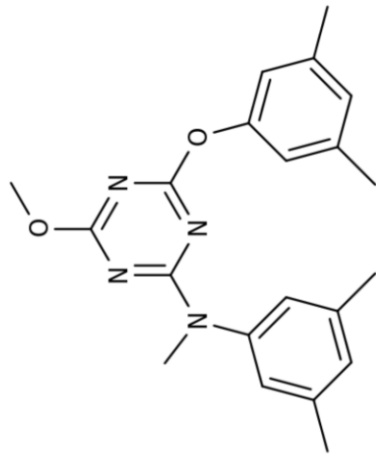

**12**

363 K

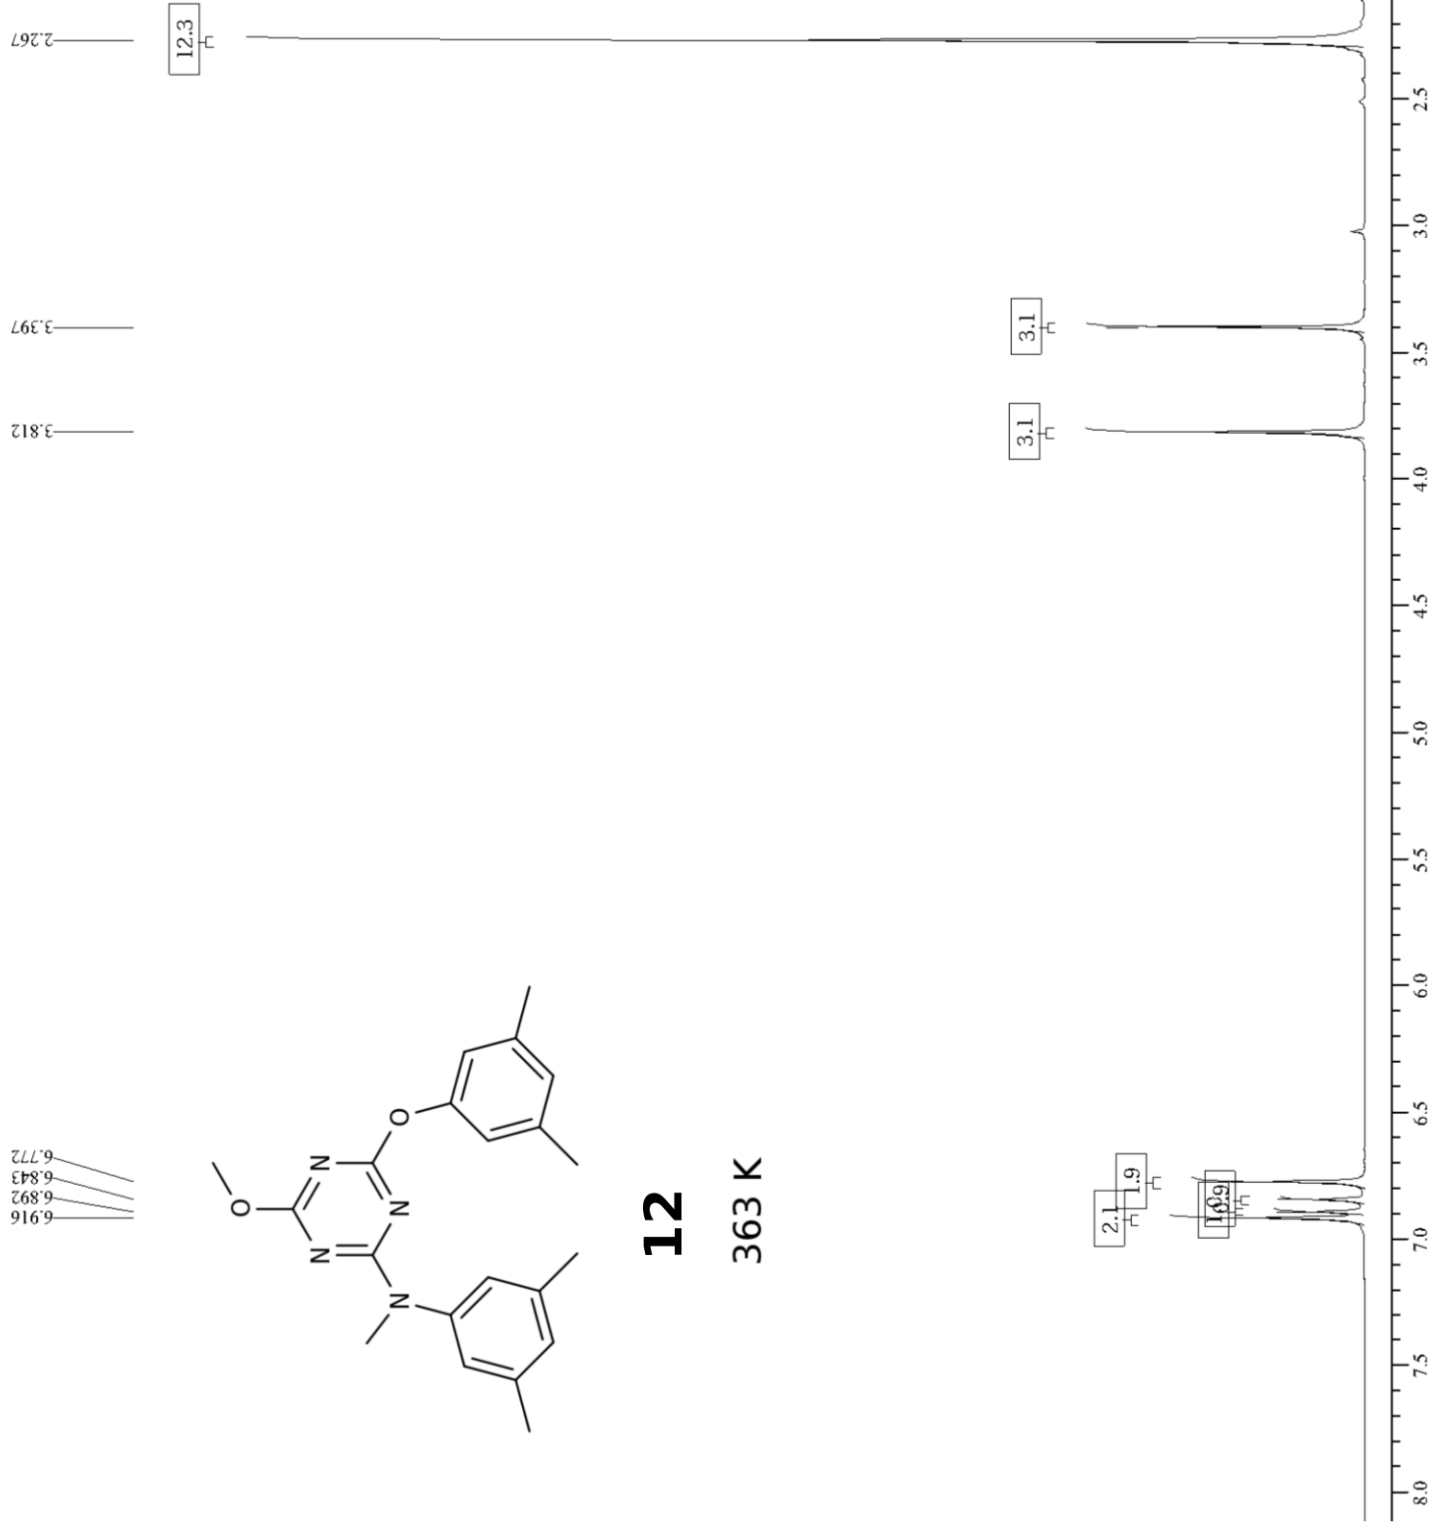

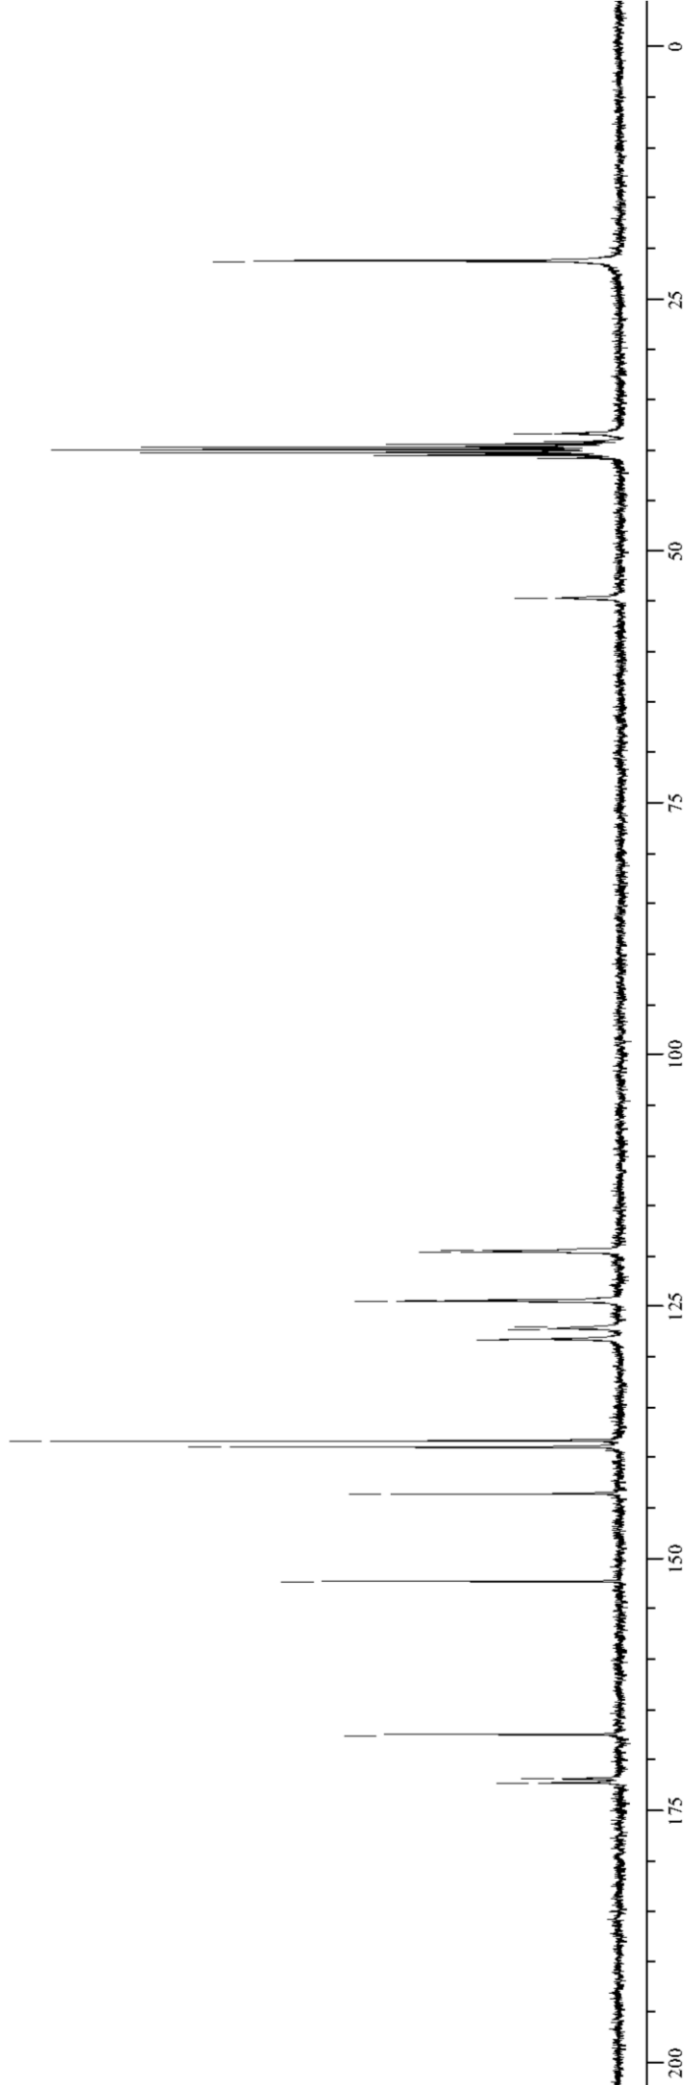

**12**

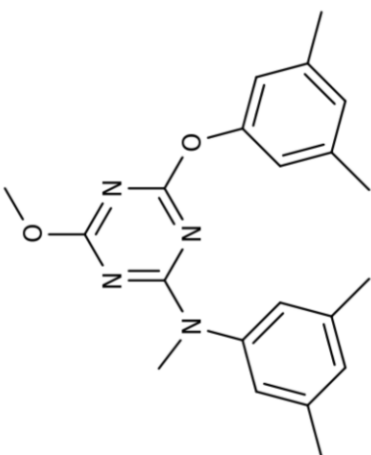

- 172.214
- 171.815
- 167.454
- 152.244
- 143.551
- 138.907
- 138.278
- 128.241
- 128.139
- 127.155
- 127.020
- 124.445
- 124.327
- 119.534
- 119.416
- 54.727
- 38.405
- 38.312
- 21.214

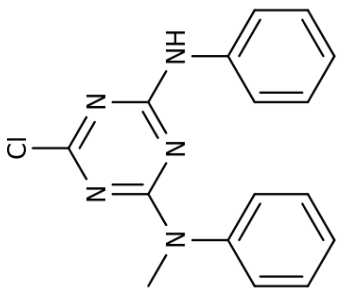

363 K

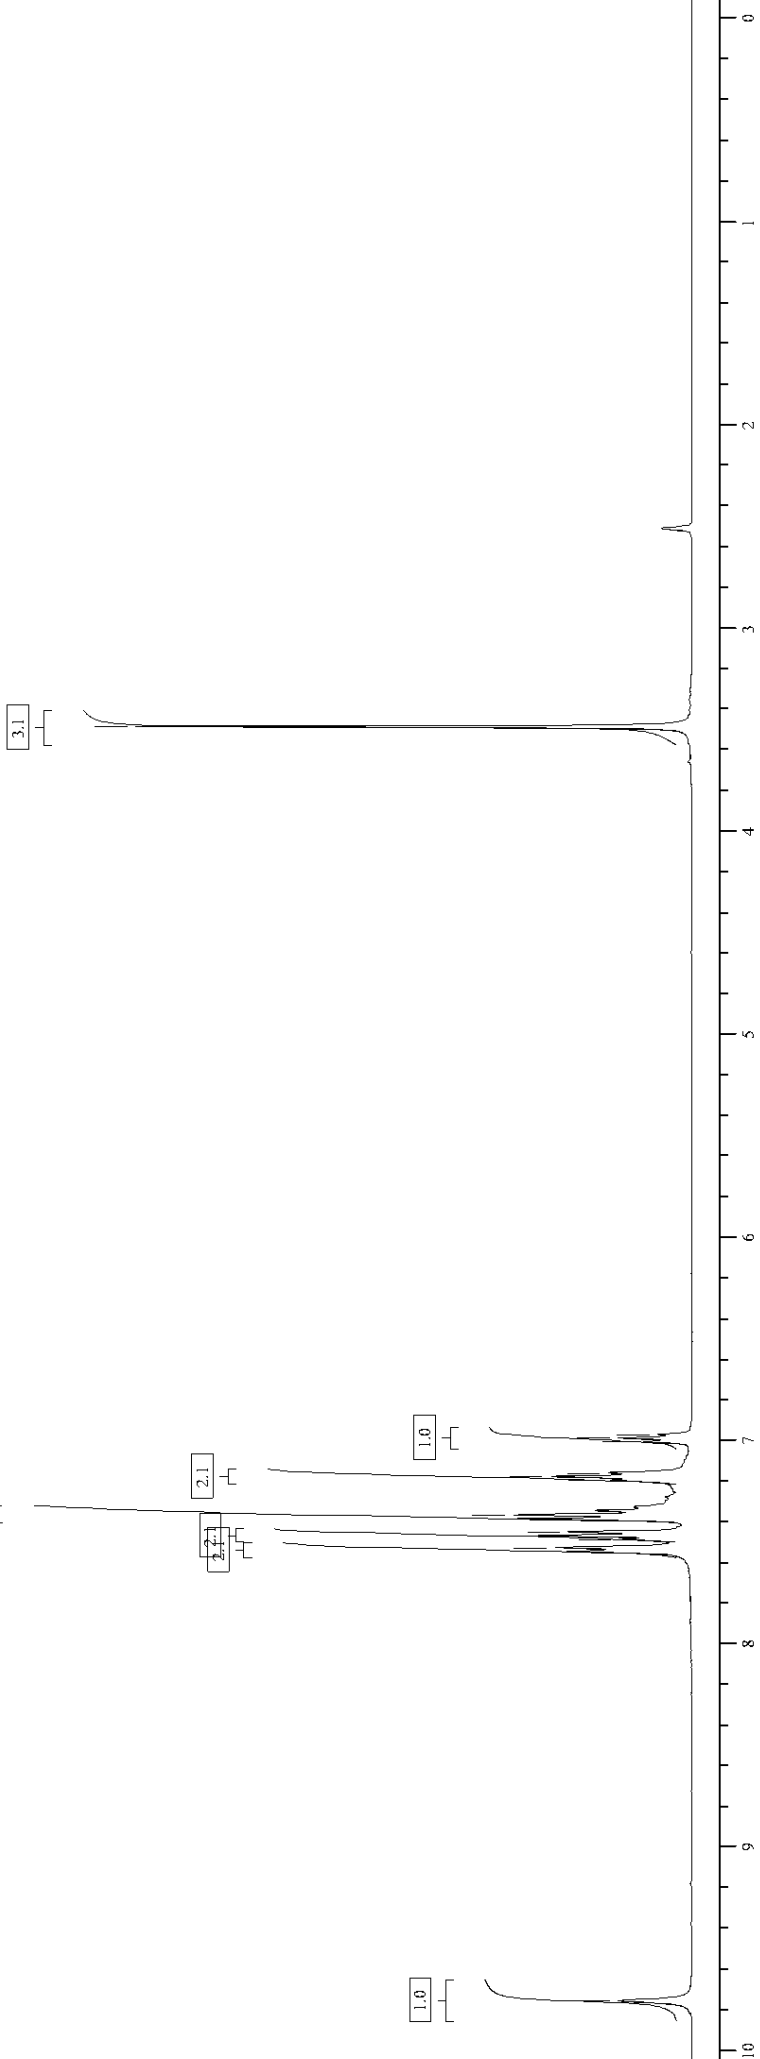

7.545  
7.526  
7.485  
7.467  
7.447  
7.365  
7.194  
7.176  
7.157  
7.004  
6.986  
6.969

3.484

9.757

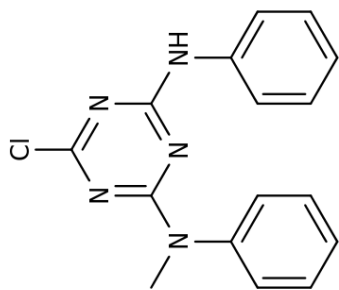

168.650  
165.505  
163.204  
143.887  
139.115  
129.471  
128.768  
127.304  
127.128  
123.216  
120.091

38.566

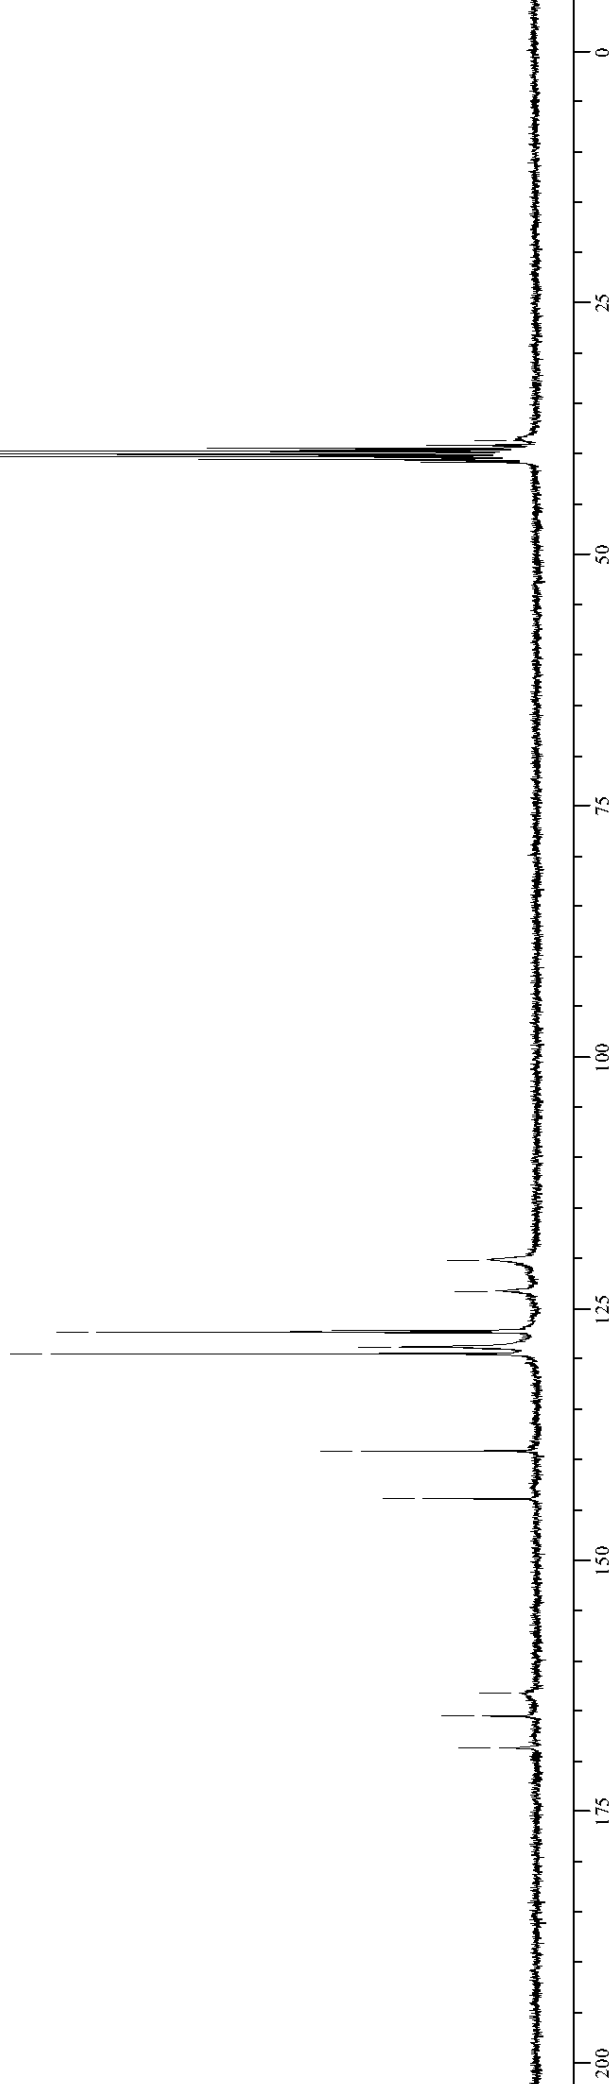

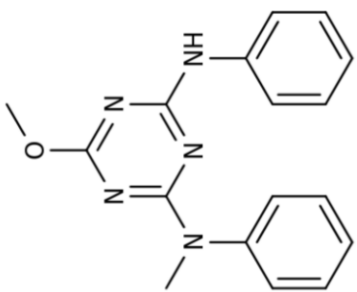

**14**

363 K

3.856  
3.495

7.624  
7.604  
7.454  
7.434  
7.415  
7.378  
7.360  
7.306  
7.288  
7.270  
7.186  
7.167  
7.147  
6.956  
6.938  
6.920

9.171

2.0  
2.0  
2.0

1.0

1.2

0.9

3.0  
3.0

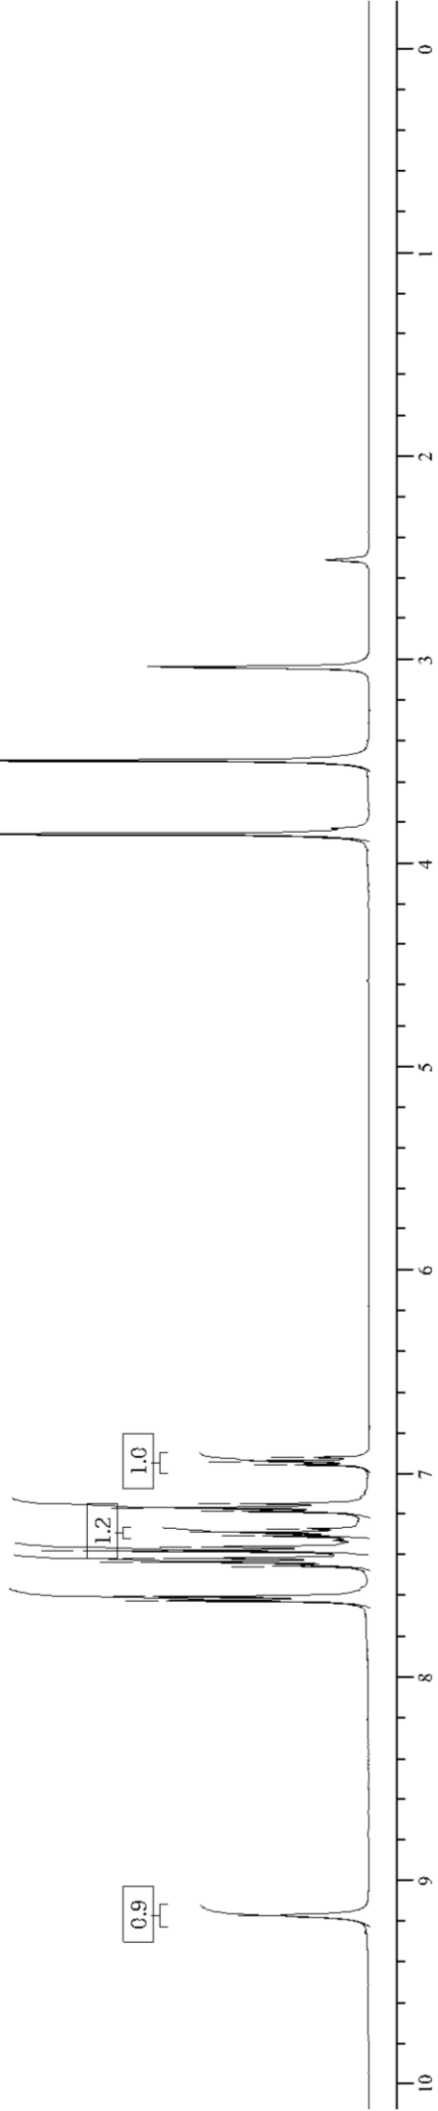



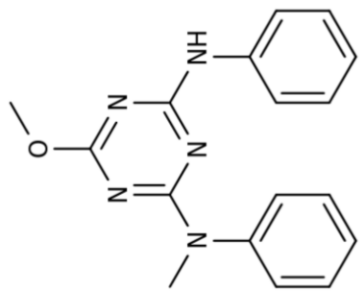

14

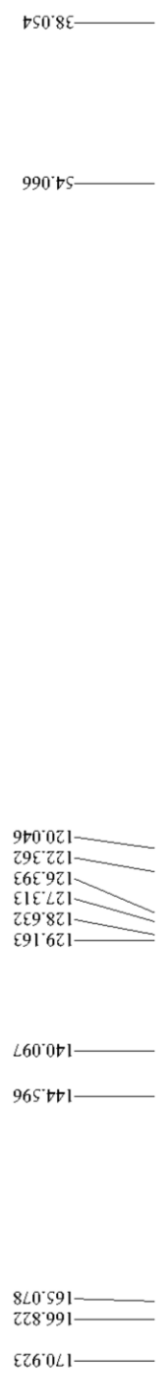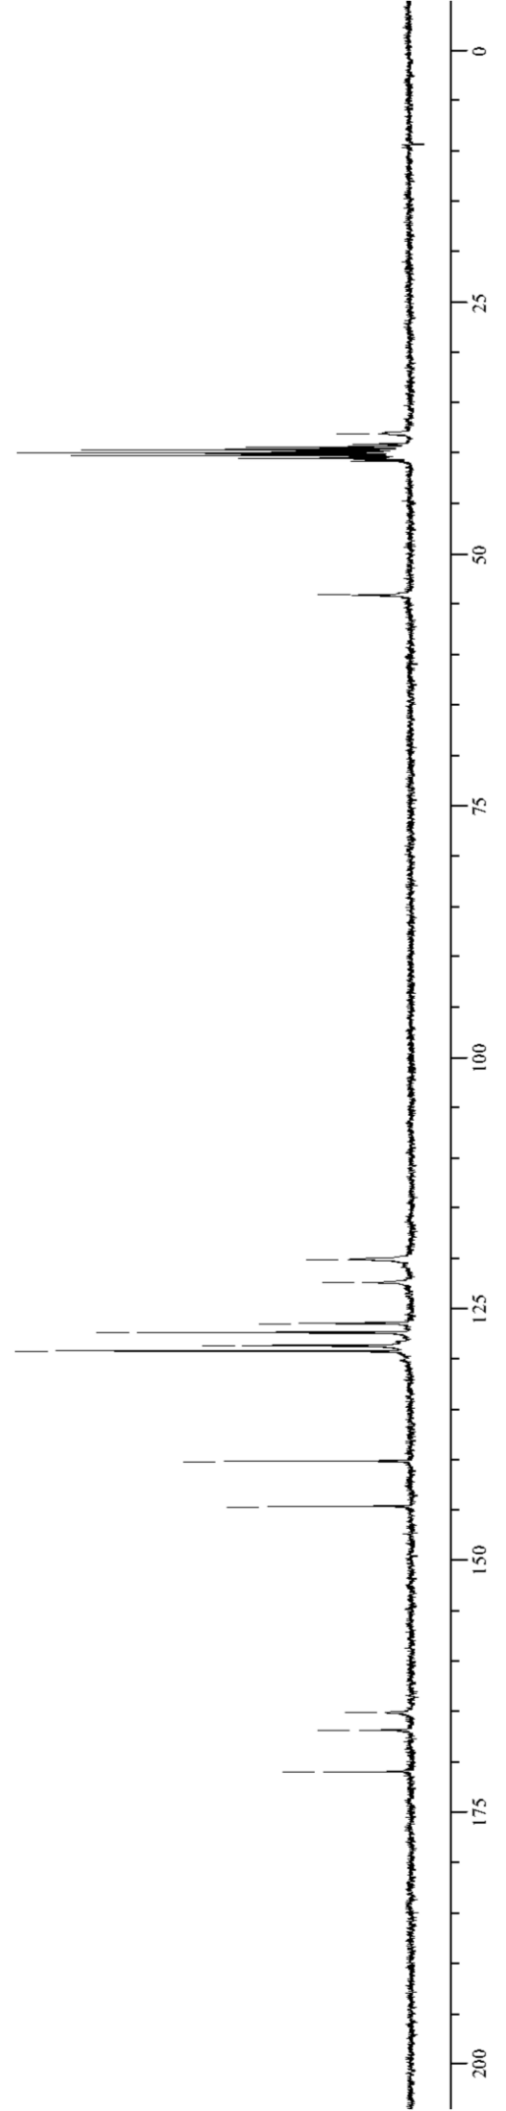

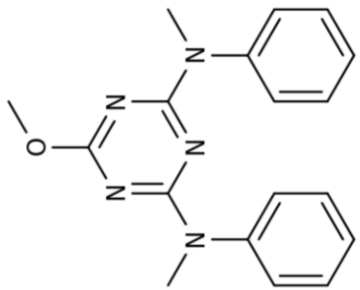

15

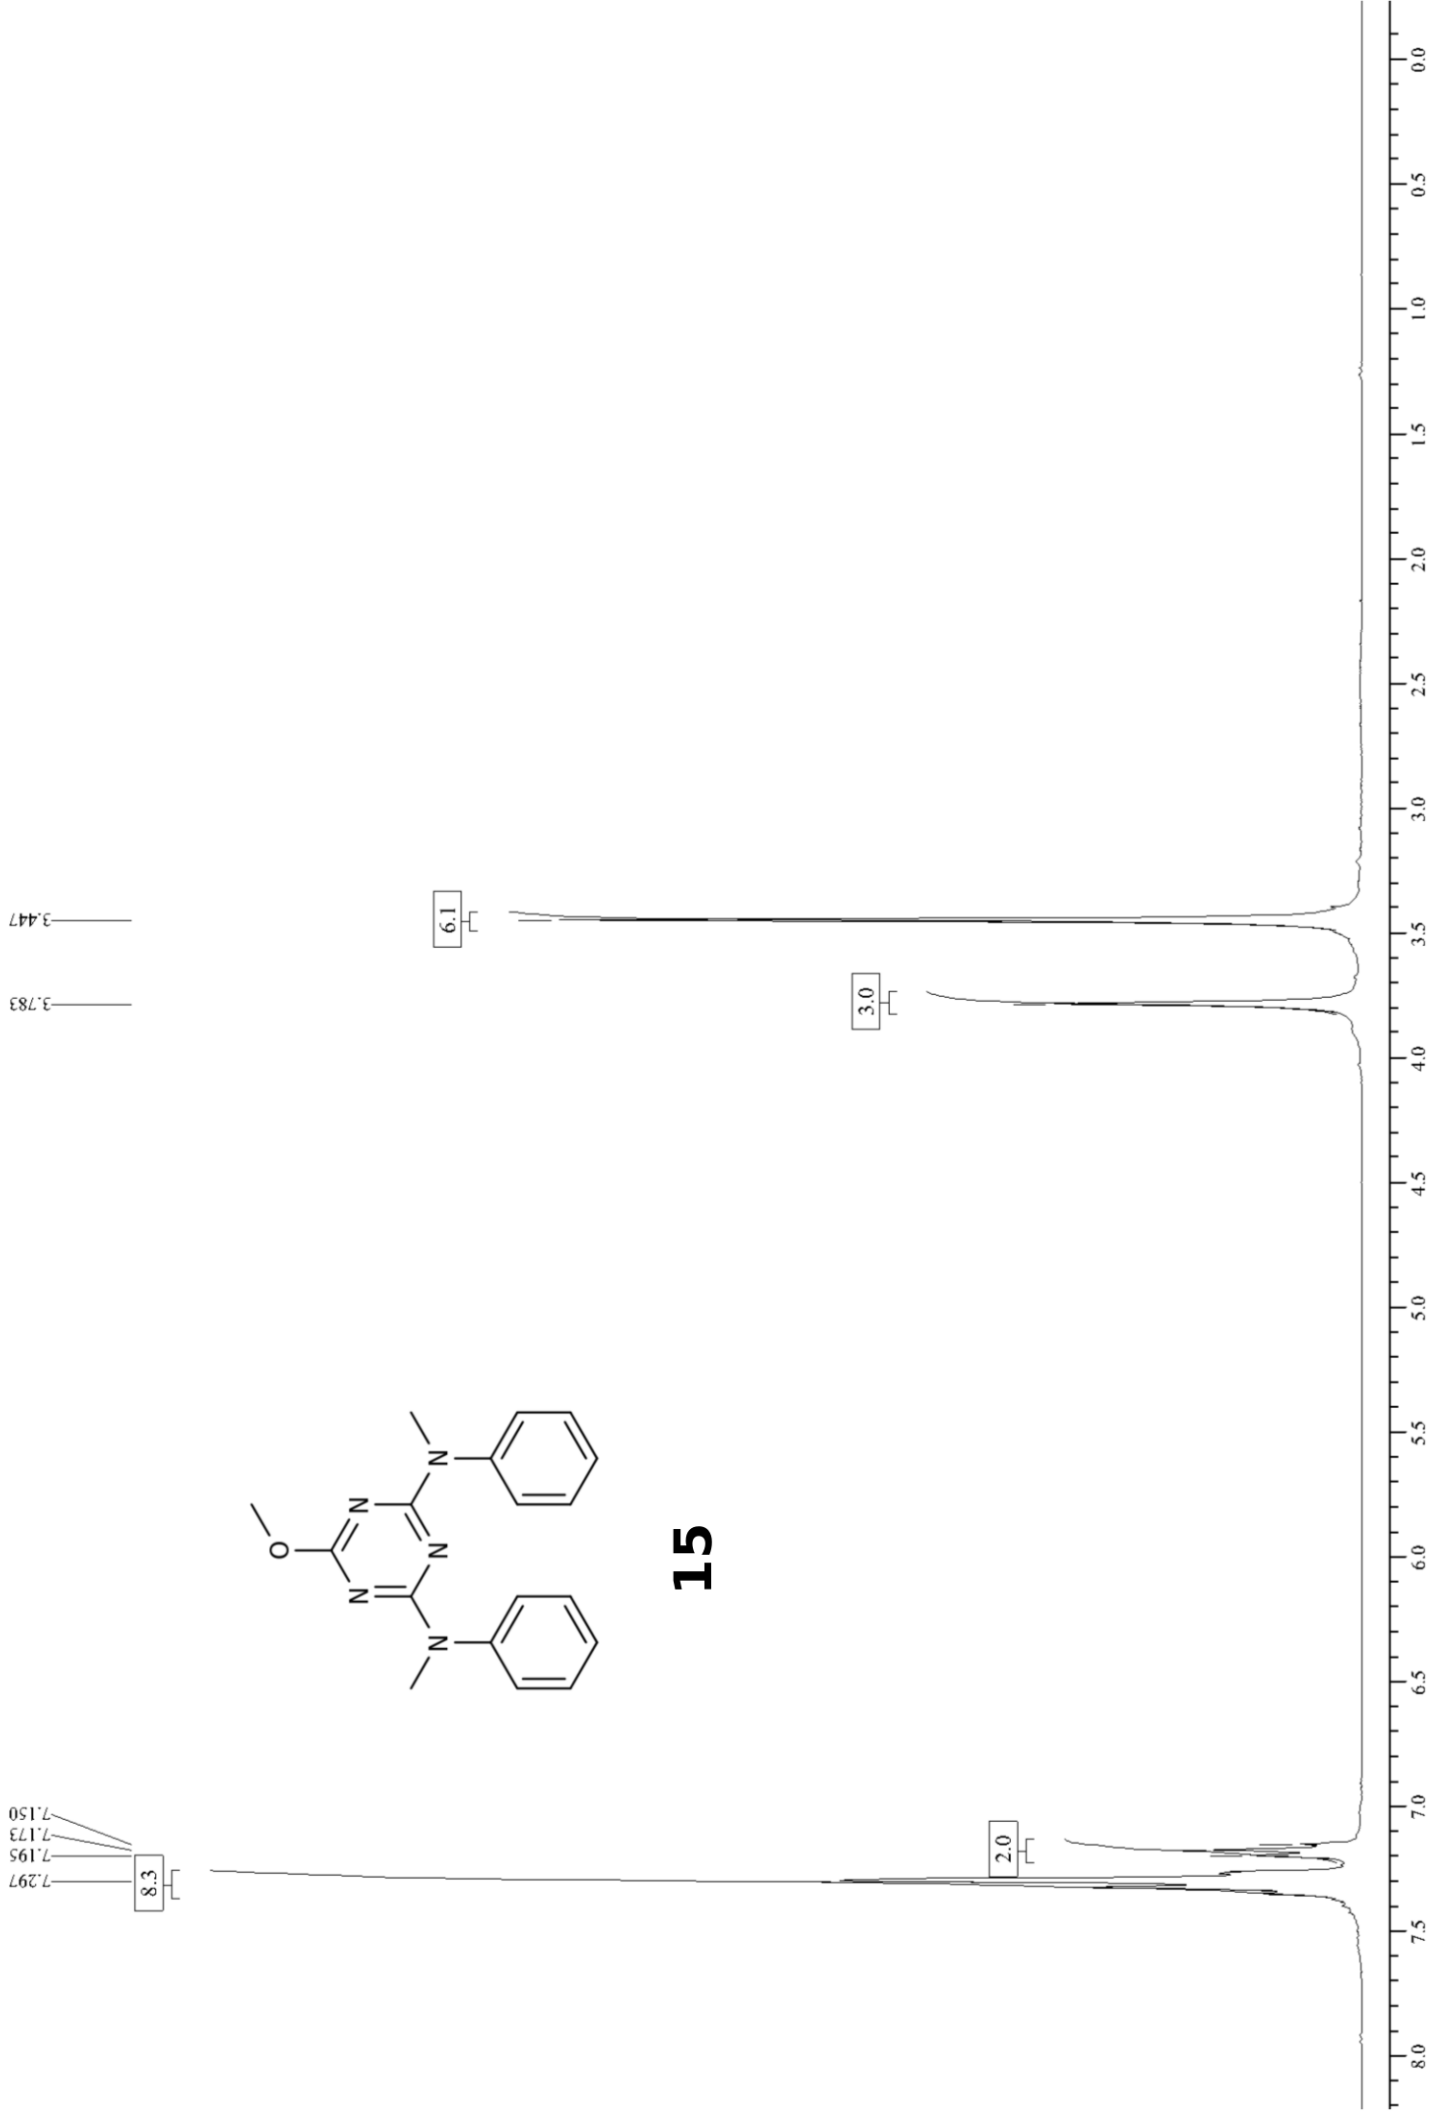

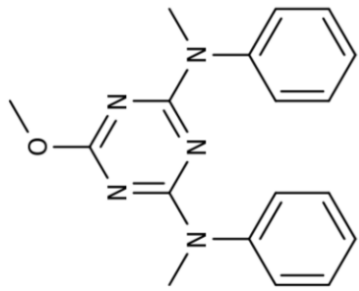

15

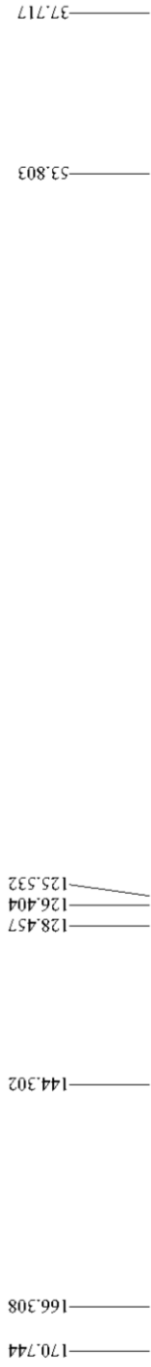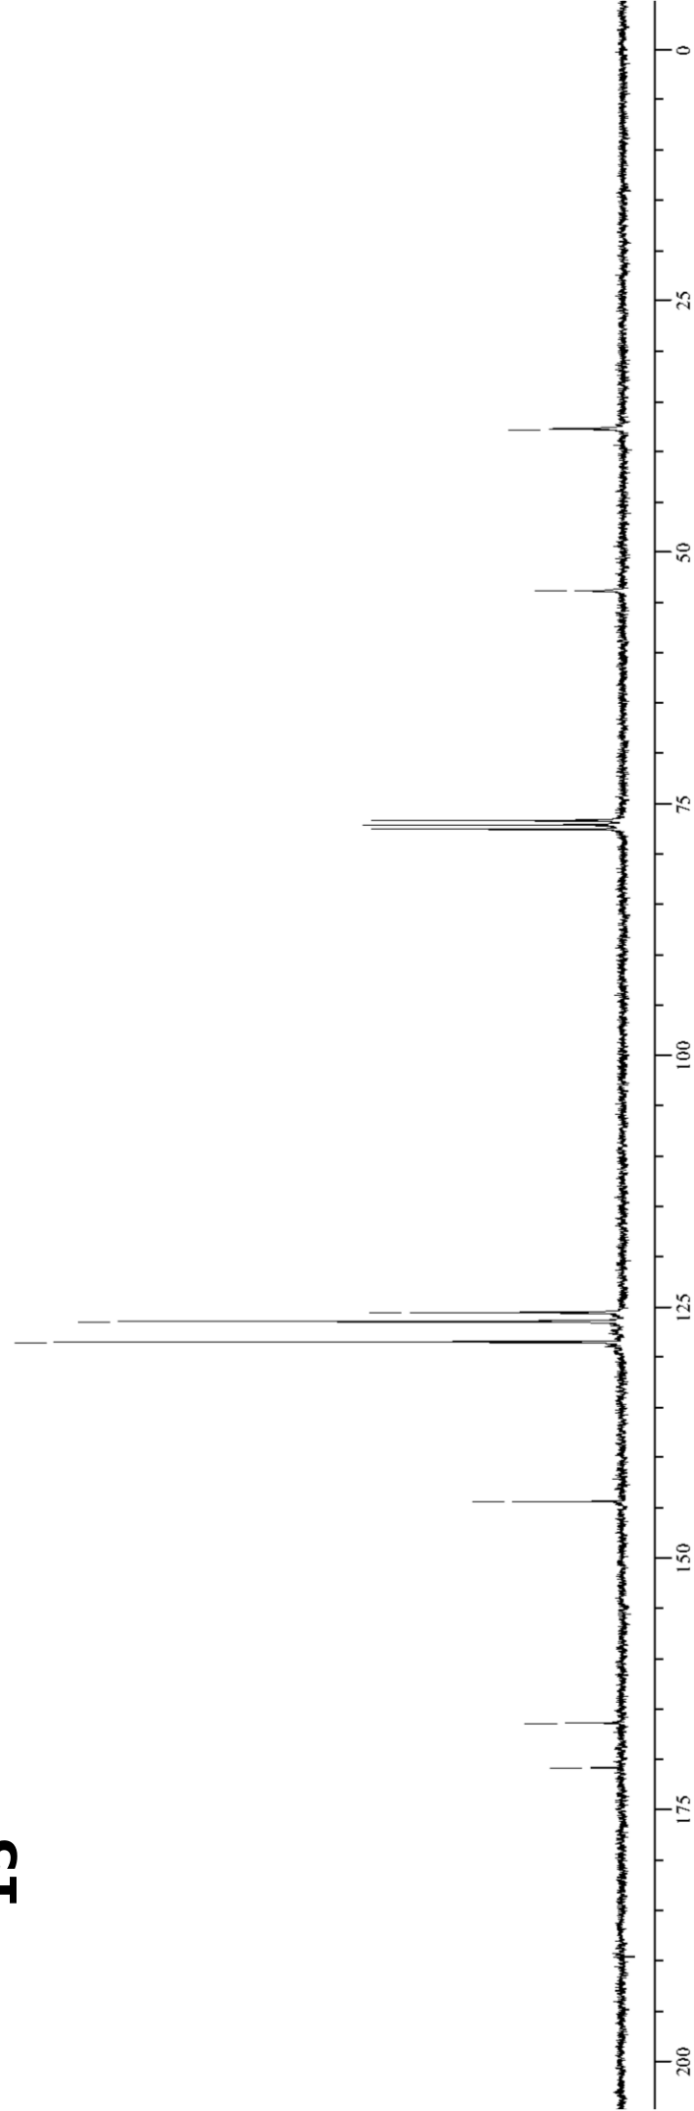

Supplement: c5cp06630a1.pdf [file c5cp06630a1.pdf]
